# Supplementary material for: Effects of Wearing FFP2 Masks on SARS-CoV-2 Infection Rates in Classrooms
Source: MDPI journal article supplement (doi:10.3390/ijerph192013511), 2022-10-19
Supplement: s1 [file s1]

## Supplementary Online Content

# Effects of wearing FFP2 masks on SARS-CoV-2 infection rates in classrooms

Jarnig G, Kerbl R, van Poppel MNM, et al.

**Table S1.** Description of the 4 time periods within the course of the study.

**Table S2.** Sample characteristics for total study population and subgroups middle and high school

**Table S3.** Cumulative percentage of students with a SARS-CoV-2 infection: students in classes with GB vs students in SF classes for subgroups sex.

**Table S4.** Detailed increase of cumulative numbers and percentage of students with a SARS-CoV-2 infection for P1 (Sep.21 and Oct.21).

**Table S5.** Detailed increase of cumulative numbers and percentage of students with a SARS-CoV-2 infection for P2 (Nov.21 and Dec.21).

**Table S6.** Detailed increase of cumulative numbers and percentage of students with a SARS-CoV-2 infection for P3 (Jan.22 and Feb.22).

**Table S7.** Detailed increase of cumulative numbers and percentage of students with a SARS-CoV-2 infection for P4 (Mar.22 and Apr.22).

**Table S8.** Detailed 7-day incidences for detected SARS-CoV-2 infections for P1 (Sep.21 and Oct.21).

**Table S9.** Detailed 7-day incidences for detected SARS-CoV-2 infections for P2 (Nov.21 and Dec.21).

**Table S10.** Detailed 7-day incidences for detected SARS-CoV-2 infections for P3 (Jan.22 and Feb.22).

**Table S11.** Detailed 7-day incidences for detected SARS-CoV-2 infections for P4 (Mar.22 and Apr.22).

**Table S12.** Potential SARS-CoV-2 infection in school classes GB vs. SF classes, using hypothesized generation time - 2 days.

**Table S13.** Potential SARS-CoV-2 infection in school classes GB vs. SF classes, using hypothesized generation time - 4 days.

**Table S14.** Potential SARS-CoV-2 infection in school classes GB vs. SF classes, using hypothesized generation time - 6 days.

**Table S15.** Potential SARS-CoV-2 infection in school classes GB vs. SF classes, using hypothesized generation time - 8 days.

**Table S16.** Binary logistic regression for Potential SARS-Cov-2 contagions in the classroom and generation times 4 and 6, for subgroup sex .

**Table S17.** Binary logistic regression for Potential SARS-Cov-2 contagions in the classroom and generation times 2 and 8, for subgroup sex .

**Figure S1.** Cumulative percentage of children with SARS-CoV-2 infections, for subgroup sex.

This supplementary material has been provided by the authors to give readers additional information about their work.

**Table S1.** Description of the 4 time periods within the course of the study.

| Time period | date range                           | Mitigation measures at school not included in physical education classes |      | School sports                                                                     |                 | Predominant SARS-CoV-2 variant | AGES                   |                         |
|-------------|--------------------------------------|--------------------------------------------------------------------------|------|-----------------------------------------------------------------------------------|-----------------|--------------------------------|------------------------|-------------------------|
|             |                                      | GB                                                                       | SF   | GB                                                                                | SF              |                                | Mean 7-day I (5 to 14) | Mean 7-day I (15 to 24) |
| P1          | September 13, 2021 to October 31,    | A, B                                                                     | A, B | Outdoor without restrictions, indoor with restrictions                            | No restrictions | B.1.617.2                      | 370.02                 | 268.88                  |
| P2          | November 1, 2021 to December 31,     | C                                                                        | C    | Outdoor with restrictions, indoor with strict restrictions and wearing FFP2 masks | No restrictions | B.1.617.2                      | 1521.82                | 962.70                  |
| P3          | January 1, 2022 to February 28, 2022 | C                                                                        | C    | Outdoor with restrictions, indoor with strict restrictions and wearing FFP2 masks | No restrictions | BA.1                           | 2797.19                | 2497.02                 |
| P4          | March 1, 2022 to April 30, 2022      | D                                                                        | D    | Outdoor without restrictions, indoor with restrictions                            | No restrictions | BA.2/BA.3                      | 2361.77                | 2185.20                 |

SARS-CoV-2 = severe acute respiratory syndrome coronavirus 2, GB = students in school classes with a general school branch, SF = students in school classes with sport focus, AGES = Austrian Agency for Health and Food Safety, 7-day I (5 to 14) = 7 days incidence for SARS-CoV-2 infections per 100,000 inhabitants in Carinthia (AUT) for children aged 5 to 14 years (<https://covid19-dashboards.ages.at/>), 7-day I (15 to 24) = 7 days incidence for SARS-CoV-2 infections per 100,000 inhabitants in Carinthia (AUT) for adolescent aged 15 to 24 years (<https://covid19-dashboards.ages.at/>), AUT = Austria, P1 = period 1 (September 13, 2021 to October 31, 2021) P2 = period 2 (November 1, 2021 to December 31, 2021), P3 = period 3 (January 1, 2022 to February 28, 2022), P4 = period 4 (March 1, 2022 to April 30, 2022), A = Risk level 1: All students can be tested voluntarily at school for SARS-CoV-2 infection by rapid anterionasal antigen test, B = Risk level 2: Unvaccinated students are tested three times weekly for SARS-CoV-2 infection (twice anterionasal rapid antigen test, once PCR test with mouth rinse) and Students are required to wear a face mask outside of classrooms, PCR = polymerase chain reaction, C = All students are tested three times weekly for SARS-CoV-2 infection (once anterionasal rapid antigen test, twice PCR test with mouth rinse) and Students are required to wear a FFP2 face mask anywhere in school building, FFP2 = filtering face piece generation 2 (FFP2 masks: have a protective effect of > 95 % for airborne particles in controlled laboratory tests; air permeability and airway resistance are standardized. The leakage is < 11 %), D = All students are tested three times weekly for SARS-CoV-2 infection (once anterionasal rapid antigen test, twice PCR test with mouth rinse), B.1.617.2 = Delta variant of SARS-CoV-2 Virus, BA.1 = Omicron variant of SARS-CoV-2 Virus, BA.2/BA.3 = Omicron variant of SARS-CoV-2 Virus.

**Table S2.** Sample characteristics for total study population and subgroups middle and high school

| Variable                                                                   | All<br>(n=614) | GB<br>(n=419) | SF<br>(n=195) | X <sup>2</sup> | t     | P value | p-lvl |
|----------------------------------------------------------------------------|----------------|---------------|---------------|----------------|-------|---------|-------|
| Female, No. (%)                                                            | 265 (43.2%)    | 216 (51.6%)   | 49 (25.1%)    | 37.872         |       | <.001   | ***   |
| Age at index, mean (SD)                                                    | 15.1 ± 2.3     | 15.3 ± 2.3    | 14.8 ± 2.2    |                | 2.752 | 0.006   | **    |
| SARS-CoV-2 infection -<br>bevor September 13,<br>2021, No. (%)             | 76 (12.4%)     | 44 (10.5%)    | 32 (16.4%)    | 4.284          |       | 0.038   | *     |
| SARS-CoV-2 infection -<br>September 13, 2021 to<br>April 30, 2022, No. (%) | 353 (57.5%)    | 229 (54.7%)   | 124 (63.6%)   | 4.348          |       | 0.037   | *     |
|                                                                            | M.S.           |               |               |                |       |         |       |
|                                                                            | All<br>(n=289) | GB<br>(n=190) | SF<br>(n=99)  |                |       |         |       |
| Female, No. (%)                                                            | 111 (38.4%)    | 84 (44.2%)    | 27 (27.3%)    | 7.893          |       | 0.005   | **    |
| Age at index, mean (SD)                                                    | 13.1 ± 1.3     | 13.2 ± 1.3    | 12.9 ± 1.2    |                | 2.105 | 0.036   | *     |
| SARS-CoV-2 infection -<br>bevor September 13,<br>2021, No. (%)             | 27 (9.3%)      | 17 (8.9%)     | 10 (10.1%)    | 0.102          |       | 0.75    |       |
| SARS-CoV-2 infection -<br>September 13, 2021 to<br>April 30, 2022, No. (%) | 173 (59.9%)    | 107 (56.3%)   | 66 (66.7%)    | 2.902          |       | 0.09    |       |
|                                                                            | H.S.           |               |               |                |       |         |       |
|                                                                            | All<br>(n=325) | GB<br>(n=229) | SF<br>(n=96)  |                |       |         |       |
| Female, No. (%)                                                            | 154 (47.4%)    | 132 (57.6%)   | 22 (22.9%)    | 32.716         |       | <.001   | ***   |
| Age at index, mean (SD)                                                    | 16.9 ± 1.2     | 17.0 ± 1.3    | 16.7 ± 1.2    |                | 2.258 | 0.025   | *     |
| SARS-CoV-2 infection -<br>bevor September 13,<br>2021, No. (%)             | 49 (15.1%)     | 27 (11.8%)    | 22 (22.9%)    | 6.540          |       | 0.011   | *     |
| SARS-CoV-2 infection -<br>September 13, 2021 to<br>April 30, 2022, No. (%) | 180 (55.4%)    | 122 (53.3%)   | 58 (60.4%)    | 1.396          |       | 0.24    |       |

SARS-CoV-2 = severe acute respiratory syndrome coronavirus 2, Data are absolute numbers (No.) and percentages (%), X<sup>2</sup> = Chi-Square Test value, t = test statistic t-test, p-lvl (P Value level) \* = P < 0.05, \*\* = P < 0.01, \*\*\* = P < 0.001, p-lvl = significance level, No. = Number, % = Percentage, M.S. = middle school (Students aged 13.1 ± 1.3 years old), H.S. = 4-year high school (Students aged 16.9 ± 1.2 years old), GB = students in school classes with a general school branch, SF = students in school classes with sport focus, n = Study population.

**Table S3.** Cumulative percentage of students with a SARS-CoV-2 infection: students in classes with GB vs students in SF classes for subgroups sex.

| Variable                       | Time period | Boys         |            |                    |                      |       |      |                      | Girls        |            |                    |                      |       |       |                      |
|--------------------------------|-------------|--------------|------------|--------------------|----------------------|-------|------|----------------------|--------------|------------|--------------------|----------------------|-------|-------|----------------------|
|                                |             | All (n=349)  |            | X <sup>2</sup>     | p Value <sup>b</sup> | p-lvl | φ    | OR (95% CI)          | All (n=265)  |            | X <sup>2</sup>     | p Value <sup>b</sup> | p-lvl | φ     | OR (95% CI)          |
|                                |             | GB (n=203)   | SF (n=146) |                    |                      |       |      |                      | GB (n=216)   | SF (n=49)  |                    |                      |       |       |                      |
| CU% SARS-CoV-2 ...,<br>No. [%] | ...Sep.21   | 1 (0.5%)     | 2 (1.4%)   | 0.767 <sup>a</sup> | 0.57                 |       | 0.05 | 2.81 (0.25 to 31.24) | 0 (0.0%)     | 0 (0.0%)   | INC                |                      |       |       |                      |
|                                | ...Oct.21   | 3 (1.5%)     | 5 (3.4%)   | 1.437 <sup>a</sup> | 0.29                 |       | 0.06 | 2.36 (0.56 to 10.05) | 2 (0.9%)     | 0 (0.0%)   | 0.457 <sup>a</sup> | >.99                 |       | -0.04 | 0.81 (0.77 to 0.86)  |
|                                | ...Nov.21   | 10 (4.9%)    | 23 (15.8%) | 11.628             | 0.001                | **    | 0.18 | 3.61 (1.66 to 7.84)  | 16 (7.4%)    | 6 (12.2%)  | 1.228 <sup>a</sup> | 0.26                 |       | 0.07  | 1.74 (0.65 to 4.72)  |
|                                | ...Dec.21   | 15 (7.4%)    | 25 (17.1%) | 7.930              | 0.005                | **    | 0.15 | 2.59 (1.31 to 5.11)  | 23 (10.6%)   | 7 (14.3%)  | 0.526              | 0.47                 |       | 0.05  | 1.40 (0.56 to 3.47)  |
|                                | ...Jan.22   | 35 (17.2%)   | 56 (38.4%) | 19.642             | <.001                | ***   | 0.24 | 2.99 (1.82 to 4.89)  | 46 (21.3%)   | 29 (59.2%) | 28.253             | <.001                | ***   | 0.33  | 5.36 (2.78 to 10.33) |
|                                | ...Feb.22   | 66 (32.5%)   | 83 (56.8%) | 20.559             | <.001                | ***   | 0.24 | 2.74 (1.76 to 4.25)  | 83 (38.4%)   | 32 (65.3%) | 11.748             | 0.001                | **    | 0.21  | 3.02 (1.58 to 5.77)  |
|                                | ...Mar.22   | 98 (48.3%)   | 87 (59.6%) | 4.363              | 0.037                | *     | 0.11 | 1.58 (1.03 to 2.43)  | 117 (54.2%)  | 33 (67.3%) | 2.825              | 0.09                 |       | 0.10  | 1.75 (0.91 to 3.36)  |
|                                | ...Apr.22   | 104 (51.2%)  | 91 (62.3%) | 4.242              | 0.039                | *     | 0.11 | 1.58 (1.02 to 2.43)  | 125 (57.9%)  | 33 (67.3%) | 1.49               | 0.22                 |       | 0.08  | 1.45 (1.02 to 2.06)  |
|                                |             | M.S. (n=178) |            |                    |                      |       |      |                      | M.S. (n=111) |            |                    |                      |       |       |                      |
|                                |             | GB (n=106)   | SF (n=72)  |                    |                      |       |      |                      | GB (n=84)    | SF (n=27)  |                    |                      |       |       |                      |
| CU% SARS-CoV-2 ...,<br>No. [%] | ...Sep.21   | 0 (0.0%)     | 1 (1.4%)   | 1.481 <sup>a</sup> | 0.40                 |       | 0.09 | 0.40 (0.34 to 0.48)  | 0 (0.0%)     | 0 (0.0%)   | INC                |                      |       |       |                      |
|                                | ...Oct.21   | 1 (0.9%)     | 2 (2.8%)   | 0.871 <sup>a</sup> | 0.57                 |       | 0.07 | 3.00 (0.27 to 33.72) | 1 (1.2%)     | 0 (0.0%)   | 0.324 <sup>a</sup> | >.99                 |       | -0.05 | 0.76 (0.68 to 0.84)  |
|                                | ...Nov.21   | 5 (4.7%)     | 12 (16.7%) | 7.088              | 0.008                | **    | 0.20 | 4.04 (1.36 to 12.03) | 4 (4.8%)     | 3 (11.1%)  | 1.394 <sup>a</sup> | 0.36                 |       | 0.11  | 2.50 (0.52 to 11.96) |
|                                | ...Dec.21   | 8 (7.5%)     | 14 (19.4%) | 5.603              | 0.018                | *     | 0.18 | 2.96 (1.17 to 7.48)  | 7 (8.3%)     | 4 (14.8%)  | 0.961 <sup>a</sup> | 0.46                 |       | 0.09  | 1.91 (0.51 to 7.12)  |
|                                | ...Jan.22   | 17 (16.0%)   | 23 (31.9%) | 6.227              | 0.013                | *     | 0.19 | 2.46 (1.20 to 5.04)  | 16 (19.0%)   | 17 (63.0%) | 18.862             | <.001                | ***   | 0.41  | 7.23 (2.79 to 18.72) |
|                                | ...Feb.22   | 39 (36.8%)   | 40 (55.6%) | 6.115              | 0.013                | *     | 0.19 | 2.15 (1.17 to 3.95)  | 31 (36.9%)   | 20 (74.1%) | 11.366             | 0.001                | **    | 0.32  | 4.89 (1.86 to 12.86) |
|                                | ...Mar.22   | 55 (51.9%)   | 43 (59.7%) | 1.064              | 0.30                 |       | 0.08 | 1.38 (0.75 to 2.52)  | 46 (54.8%)   | 21 (77.8%) | 4.524              | 0.033                | *     | 0.20  | 2.89 (1.06 to 7.89)  |
|                                | ...Apr.22   | 57 (53.8%)   | 45 (62.5%) | 1.334              | 0.25                 |       | 0.09 | 1.43 (0.78 to 2.64)  | 50 (59.5%)   | 21 (77.8%) | 2.954              | 0.09                 |       | 0.16  | 2.38 (0.87 to 6.51)  |
|                                |             | H.S. (n=171) |            |                    |                      |       |      |                      | H.S. (n=154) |            |                    |                      |       |       |                      |
|                                |             | GB (n=97)    | SF (n=74)  |                    |                      |       |      |                      | GB (n=132)   | SF (n=22)  |                    |                      |       |       |                      |
| CU% SARS-CoV-2 ...,<br>No. [%] | ...Sep.21   | 1 (1.0%)     | 1 (1.4%)   | 0.037 <sup>a</sup> | >.99                 |       | 0.02 | 1.32 (0.08 to 21.38) | 0 (0.0%)     | 0 (0.0%)   | INC                |                      |       |       |                      |
|                                | ...Oct.21   | 2 (2.1%)     | 3 (4.1%)   | 0.587 <sup>a</sup> | 0.65                 |       | 0.06 | 2.00 (0.33 to 12.33) | 1 (1.2%)     | 0 (0.0%)   | 0.168 <sup>a</sup> | >.99                 |       | -0.03 | 0.86 (0.80 to 0.91)  |
|                                | ...Nov.21   | 5 (5.2%)     | 11 (14.9%) | 4.667              | 0.031                | *     | 0.17 | 3.21 (1.06 to 9.70)  | 12 (9.1%)    | 3 (13.6%)  | 0.443 <sup>a</sup> | 0.45                 |       | 0.05  | 1.58 (0.41 to 6.12)  |
|                                | ...Dec.21   | 7 (7.2%)     | 11 (14.9%) | 2.607              | 0.11                 |       | 0.12 | 2.25 (0.83 to 6.11)  | 16 (12.1%)   | 3 (13.6%)  | 0.040 <sup>a</sup> | 0.74                 |       | 0.02  | 1.15 (0.30 to 4.31)  |
|                                | ...Jan.22   | 18 (18.6%)   | 33 (44.6%) | 13.598             | <.001                | ***   | 0.28 | 3.53 (1.78 to 7.02)  | 30 (22.7%)   | 12 (54.5%) | 9.625              | 0.002                | **    | 0.25  | 4.08 (1.61 to 10.37) |
|                                | ...Feb.22   | 27 (27.8%)   | 43 (58.1%) | 15.911             | <.001                | ***   | 0.31 | 3.60 (1.90 to 6.82)  | 52 (39.4%)   | 12 (54.5%) | 1.782              | 0.18                 |       | 0.11  | 1.85 (0.74 to 4.58)  |
|                                | ...Mar.22   | 43 (44.3%)   | 44 (59.5%) | 3.845              | 0.05                 | *     | 0.15 | 1.84 (1.00 to 3.40)  | 71 (53.8%)   | 12 (54.5%) | 0.004              | 0.95                 |       | 0.01  | 1.03 (0.42 to 2.55)  |
|                                | ...Apr.22   | 47 (48.5%)   | 46 (62.2%) | 3.180              | 0.08                 |       | 0.14 | 1.75 (0.94 to 3.24)  | 75 (56.8%)   | 12 (54.5%) | 0.040              | 0.84                 |       | -0.02 | 0.91 (0.37 to 2.26)  |

a = 2 cells (50,0%) have expected count less than 5; b = If ( a ) occurred, Fisher's Exact Test was used. Data are No. (%), n = Study population, GB = students in school classes with a general school branch, SF = students in school classes with sport focus, X<sup>2</sup> = Chi-Square Test value, p-lvl (P Value level) \* = P < 0.05, \*\* = P < 0.01, \*\*\* = P < 0.001, p-lvl = significance level, φ = Effect size Phi, OR = odds ratio (with 1 for students in classes without sport focus), CI = confidence interval, CU% SARS-CoV-2 = cumulative percentage of students with a SARS-COV-2 infections at the End of..., SARS-CoV-2 = severe acute respiratory syndrome coronavirus 2, P1 = period 1 (September 13, 2021 to October 31, 2021) P2 = period 2 (November 1, 2021 to December 31, 2021), P3 = period 3 (January 1, 2022 to February 28, 2022), P4 = period 4 (March 1, 2022 to April 30, 2022), INC = insufficient number of potential infection cases.

**Table S4.** Detailed increase of cumulative numbers and percentage of students with a SARS-CoV-2 infection for P1 (Sep.21 and Oct.21).

| Mo.    | M.S.          |       |              |       | H.S.          |       |              |       | Mo.    | M.S.          |       |              |       | H.S.          |       |              |       |
|--------|---------------|-------|--------------|-------|---------------|-------|--------------|-------|--------|---------------|-------|--------------|-------|---------------|-------|--------------|-------|
| Sep.21 | GB<br>(n=190) |       | SF<br>(n=99) |       | GB<br>(n=229) |       | SF<br>(n=96) |       | Oct.21 | GB<br>(n=190) |       | SF<br>(n=99) |       | GB<br>(n=229) |       | SF<br>(n=96) |       |
|        | No.           | %     | No.          | %     | No.           | %     | No.          | %     |        | No.           | %     | No.          | %     | No.           | %     | No.          | %     |
| 1      |               |       |              |       |               |       |              |       | 1      | 0             | 0.00% | 1            | 1.00% | 1             | 0.40% | 1            | 1.00% |
| 2      |               |       |              |       |               |       |              |       | 2      | 0             | 0.00% | 1            | 1.00% | 1             | 0.40% | 1            | 1.00% |
| 3      |               |       |              |       |               |       |              |       | 3      | 0             | 0.00% | 1            | 1.00% | 1             | 0.40% | 1            | 1.00% |
| 4      |               |       |              |       |               |       |              |       | 4      | 0             | 0.00% | 1            | 1.00% | 1             | 0.40% | 1            | 1.00% |
| 5      |               |       |              |       |               |       |              |       | 5      | 0             | 0.00% | 1            | 1.00% | 2             | 0.90% | 1            | 1.00% |
| 6      |               |       |              |       |               |       |              |       | 6      | 0             | 0.00% | 1            | 1.00% | 2             | 0.90% | 1            | 1.00% |
| 7      |               |       |              |       |               |       |              |       | 7      | 0             | 0.00% | 1            | 1.00% | 2             | 0.90% | 1            | 1.00% |
| 8      |               |       |              |       |               |       |              |       | 8      | 0             | 0.00% | 1            | 1.00% | 2             | 0.90% | 1            | 1.00% |
| 9      |               |       |              |       |               |       |              |       | 9      | 0             | 0.00% | 1            | 1.00% | 2             | 0.90% | 1            | 1.00% |
| 10     |               |       |              |       |               |       |              |       | 10     | 0             | 0.00% | 1            | 1.00% | 2             | 0.90% | 1            | 1.00% |
| 11     |               |       |              |       |               |       |              |       | 11     | 0             | 0.00% | 1            | 1.00% | 2             | 0.90% | 1            | 1.00% |
| 12     |               |       |              |       |               |       |              |       | 12     | 0             | 0.00% | 1            | 1.00% | 2             | 0.90% | 1            | 1.00% |
| 13     | 0             | 0.00% | 0            | 0.00% | 0             | 0.00% | 0            | 0.00% | 13     | 0             | 0.00% | 1            | 1.00% | 2             | 0.90% | 1            | 1.00% |
| 14     | 0             | 0.00% | 0            | 0.00% | 0             | 0.00% | 0            | 0.00% | 14     | 0             | 0.00% | 1            | 1.00% | 2             | 0.90% | 2            | 2.10% |
| 15     | 0             | 0.00% | 0            | 0.00% | 0             | 0.00% | 0            | 0.00% | 15     | 0             | 0.00% | 1            | 1.00% | 2             | 0.90% | 2            | 2.10% |
| 16     | 0             | 0.00% | 0            | 0.00% | 0             | 0.00% | 0            | 0.00% | 16     | 0             | 0.00% | 1            | 1.00% | 2             | 0.90% | 2            | 2.10% |
| 17     | 0             | 0.00% | 0            | 0.00% | 0             | 0.00% | 0            | 0.00% | 17     | 0             | 0.00% | 1            | 1.00% | 2             | 0.90% | 2            | 2.10% |
| 18     | 0             | 0.00% | 0            | 0.00% | 0             | 0.00% | 0            | 0.00% | 18     | 0             | 0.00% | 1            | 1.00% | 2             | 0.90% | 2            | 2.10% |
| 19     | 0             | 0.00% | 0            | 0.00% | 0             | 0.00% | 0            | 0.00% | 19     | 0             | 0.00% | 1            | 1.00% | 2             | 0.90% | 2            | 2.10% |
| 20     | 0             | 0.00% | 0            | 0.00% | 0             | 0.00% | 0            | 0.00% | 20     | 1             | 0.50% | 2            | 2.00% | 2             | 0.90% | 2            | 2.10% |
| 21     | 0             | 0.00% | 0            | 0.00% | 0             | 0.00% | 0            | 0.00% | 21     | 1             | 0.50% | 2            | 2.00% | 2             | 0.90% | 2            | 2.10% |
| 22     | 0             | 0.00% | 0            | 0.00% | 0             | 0.00% | 0            | 0.00% | 22     | 2             | 1.10% | 2            | 2.00% | 2             | 0.90% | 2            | 2.10% |
| 23     | 0             | 0.00% | 0            | 0.00% | 0             | 0.00% | 1            | 1.00% | 23     | 2             | 1.10% | 2            | 2.00% | 2             | 0.90% | 2            | 2.10% |
| 24     | 0             | 0.00% | 0            | 0.00% | 0             | 0.00% | 1            | 1.00% | 24     | 2             | 1.10% | 2            | 2.00% | 2             | 0.90% | 2            | 2.10% |
| 25     | 0             | 0.00% | 0            | 0.00% | 0             | 0.00% | 1            | 1.00% | 25     | 2             | 1.10% | 2            | 2.00% | 2             | 0.90% | 2            | 2.10% |
| 26     | 0             | 0.00% | 0            | 0.00% | 0             | 0.00% | 1            | 1.00% | 26     | 2             | 1.10% | 2            | 2.00% | 2             | 0.90% | 2            | 2.10% |
| 27     | 0             | 0.00% | 0            | 0.00% | 1             | 0.40% | 1            | 1.00% | 27     | 2             | 1.10% | 2            | 2.00% | 2             | 0.90% | 3            | 3.10% |
| 28     | 0             | 0.00% | 0            | 0.00% | 1             | 0.40% | 1            | 1.00% | 28     | 2             | 1.10% | 2            | 2.00% | 3             | 1.30% | 3            | 3.10% |
| 29     | 0             | 0.00% | 1            | 1.00% | 1             | 0.40% | 1            | 1.00% | 29     | 2             | 1.10% | 2            | 2.00% | 3             | 1.30% | 3            | 3.10% |
| 30     | 0             | 0.00% | 1            | 1.00% | 1             | 0.40% | 1            | 1.00% | 30     | 2             | 1.10% | 2            | 2.00% | 3             | 1.30% | 3            | 3.10% |
|        |               |       |              |       |               |       |              |       | 31     | 2             | 1.10% | 2            | 2.00% | 3             | 1.30% | 3            | 3.10% |

SARS-CoV-2 = severe acute respiratory syndrome coronavirus 2, P1 = period 1 (September 13, 2021 to October 31, 2021), Data are cumulative numbers (No.) and percentages (%) of SARS-CoV-2 infections detected, No. = Number, % = Percentage, Mo. = month, M.S. = middle school (Students aged  $13.1 \pm 1.3$  years old), H.S. = 4-year high school (Students aged  $16.9 \pm 1.2$  years old), GB = students in school classes with a general school branch, SF = students in school classes with sport focus, n = Study population, Sep.21 = September 2021, Oct.21 = October 2021.

**Table S5.** Detailed increase of cumulative numbers and percentage of students with a SARS-CoV-2 infection for P2 (Nov.21 and Dec.21).

| Mo.    | M.S.          |      |              |       | H.S.          |      |              |       | Mo.    | M.S.          |      |              |       | H.S.          |       |              |       |
|--------|---------------|------|--------------|-------|---------------|------|--------------|-------|--------|---------------|------|--------------|-------|---------------|-------|--------------|-------|
| Nov.21 | GB<br>(n=190) |      | SF<br>(n=99) |       | GB<br>(n=229) |      | SF<br>(n=96) |       | Dec.21 | GB<br>(n=190) |      | SF<br>(n=99) |       | GB<br>(n=229) |       | SF<br>(n=96) |       |
|        | No.           | %    | No.          | %     | No.           | %    | No.          | %     |        | No.           | %    | No.          | %     | No.           | %     | No.          | %     |
| 1      | 2             | 1.1% | 3            | 3.0%  | 3             | 1.3% | 3            | 3.1%  | 1      | 10            | 5.3% | 15           | 15.2% | 17            | 7.4%  | 14           | 14.6% |
| 2      | 2             | 1.1% | 4            | 4.0%  | 3             | 1.3% | 3            | 3.1%  | 2      | 10            | 5.3% | 15           | 15.2% | 17            | 7.4%  | 14           | 14.6% |
| 3      | 2             | 1.1% | 5            | 5.1%  | 3             | 1.3% | 4            | 4.2%  | 3      | 10            | 5.3% | 15           | 15.2% | 17            | 7.4%  | 14           | 14.6% |
| 4      | 3             | 1.6% | 5            | 5.1%  | 4             | 1.7% | 4            | 4.2%  | 4      | 10            | 5.3% | 15           | 15.2% | 17            | 7.4%  | 14           | 14.6% |
| 5      | 3             | 1.6% | 5            | 5.1%  | 6             | 2.6% | 4            | 4.2%  | 5      | 10            | 5.3% | 15           | 15.2% | 18            | 7.9%  | 14           | 14.6% |
| 6      | 3             | 1.6% | 5            | 5.1%  | 6             | 2.6% | 5            | 5.2%  | 6      | 11            | 5.8% | 16           | 16.2  | 19            | 8.3%  | 14           | 14.6% |
| 7      | 3             | 1.6% | 5            | 5.1%  | 7             | 3.1% | 5            | 5.2%  | 7      | 11            | 5.8% | 16           | 16.2% | 20            | 8.7%  | 14           | 14.6% |
| 8      | 3             | 1.6% | 6            | 6.1%  | 8             | 3.5% | 7            | 7.3%  | 8      | 11            | 5.8% | 16           | 16.2% | 20            | 8.7%  | 14           | 14.6% |
| 9      | 3             | 1.6% | 6            | 6.1%  | 8             | 3.5% | 8            | 8.3%  | 9      | 11            | 5.8% | 16           | 16.2% | 20            | 8.7%  | 14           | 14.6% |
| 10     | 3             | 1.6% | 6            | 6.1%  | 9             | 3.9% | 9            | 9.4%  | 10     | 12            | 6.3% | 16           | 16.2% | 21            | 9.2%  | 14           | 14.6% |
| 11     | 3             | 1.6% | 6            | 6.1%  | 11            | 4.8% | 9            | 9.4%  | 11     | 13            | 6.8% | 16           | 16.2% | 21            | 9.2%  | 14           | 14.6% |
| 12     | 4             | 2.1% | 6            | 6.1%  | 11            | 4.8% | 9            | 9.4%  | 12     | 13            | 6.8% | 16           | 16.2% | 21            | 9.2%  | 14           | 14.6% |
| 13     | 5             | 2.6% | 6            | 6.1%  | 11            | 4.8% | 9            | 9.4%  | 13     | 14            | 7.4% | 16           | 16.2% | 23            | 10.0% | 14           | 14.6% |
| 14     | 5             | 2.6% | 6            | 6.1%  | 12            | 5.2% | 9            | 9.4%  | 14     | 14            | 7.4% | 16           | 16.2% | 23            | 10.0% | 14           | 14.6% |
| 15     | 6             | 3.2% | 6            | 6.1%  | 13            | 5.7% | 10           | 10.4% | 15     | 15            | 7.9% | 16           | 16.2% | 23            | 10.0% | 14           | 14.6% |
| 16     | 6             | 3.2% | 7            | 7.1%  | 13            | 5.7% | 10           | 10.4% | 16     | 15            | 7.9% | 16           | 16.2% | 23            | 10.0% | 14           | 14.6% |
| 17     | 6             | 3.2% | 7            | 7.1%  | 14            | 6.1% | 10           | 10.4% | 17     | 15            | 7.9% | 16           | 16.2% | 23            | 10.0% | 14           | 14.6% |
| 18     | 6             | 3.2% | 7            | 7.1%  | 15            | 6.6% | 10           | 10.4% | 18     | 15            | 7.9% | 16           | 16.2% | 23            | 10.0% | 14           | 14.6% |
| 19     | 6             | 3.2% | 7            | 7.1%  | 16            | 7.0% | 11           | 11.5% | 19     | 15            | 7.9% | 16           | 16.2% | 23            | 10.0% | 14           | 14.6% |
| 20     | 6             | 3.2% | 7            | 7.1%  | 16            | 7.0% | 13           | 13.5% | 20     | 15            | 7.9% | 16           | 16.2% | 23            | 10.0% | 14           | 14.6% |
| 21     | 6             | 3.2% | 7            | 7.1%  | 16            | 7.0% | 13           | 13.5% | 21     | 15            | 7.9% | 16           | 16.2  | 23            | 10.0% | 14           | 14.6% |
| 22     | 6             | 3.2% | 7            | 7.1%  | 16            | 7.0% | 13           | 13.5% | 22     | 15            | 7.9% | 16           | 16.2% | 23            | 10.0% | 14           | 14.6% |
| 23     | 6             | 3.2% | 7            | 7.1%  | 16            | 7.0% | 13           | 13.5% | 23     | 15            | 7.9% | 16           | 16.2% | 23            | 10.0% | 14           | 14.6% |
| 24     | 6             | 3.2% | 9            | 9.1%  | 16            | 7.0% | 13           | 13.5% | 24     | 15            | 7.9% | 16           | 16.2% | 23            | 10.0% | 14           | 14.6% |
| 25     | 7             | 3.7% | 12           | 12.1% | 16            | 7.0% | 13           | 13.5% | 25     | 15            | 7.9% | 16           | 16.2% | 23            | 10.0% | 14           | 14.6% |
| 26     | 8             | 4.2% | 14           | 14.1% | 17            | 7.4% | 14           | 14.6% | 26     | 15            | 7.9% | 17           | 17.2% | 23            | 10.0% | 14           | 14.6% |
| 27     | 8             | 4.2% | 14           | 14.1% | 17            | 7.4% | 14           | 14.6% | 27     | 15            | 7.9% | 17           | 17.2% | 23            | 10.0% | 14           | 14.6% |
| 28     | 8             | 4.2% | 14           | 14.1% | 17            | 7.4% | 14           | 14.6% | 28     | 15            | 7.9% | 17           | 17.2% | 23            | 10.0% | 14           | 14.6% |
| 29     | 8             | 4.2% | 15           | 15.2% | 17            | 7.4% | 14           | 14.6% | 29     | 15            | 7.9% | 18           | 18.2% | 23            | 10.0% | 14           | 14.6% |
| 30     | 9             | 4.7% | 15           | 15.2% | 17            | 7.4% | 14           | 14.6% | 30     | 15            | 7.9% | 18           | 18.2% | 23            | 10.0% | 14           | 14.6% |
|        |               |      |              |       |               |      |              |       | 31     | 15            | 7.9% | 18           | 18.2% | 23            | 10.0% | 14           | 14.6% |

SARS-CoV-2 = severe acute respiratory syndrome coronavirus 2, P2 = period 2 (November 1, 2021 to December 31, 2021), Data are cumulative numbers (No.) and percentages (%) of SARS-CoV-2 infections detected, No. = Number, % = Percentage, Mo. = month, M.S. = middle school (Students aged  $13.1 \pm 1.3$  years old), H.S. = 4-year high school (Students aged  $16.9 \pm 1.2$  years old), GB = students in school classes with a general school branch, SF = students in school classes with sport focus, n = Study population, Nov.21 = November 2021, Dec.21 = December 2021.

**Table S6.** Detailed increase of cumulative numbers and percentage of students with a SARS-CoV-2 infection for P3 (Jan.22 and Feb.22).

| Mo.    | M.S.          |       |              |       | H.S.          |       |              |       | Mo.    | M.S.          |       |              |       | H.S.          |       |              |       |
|--------|---------------|-------|--------------|-------|---------------|-------|--------------|-------|--------|---------------|-------|--------------|-------|---------------|-------|--------------|-------|
| Jan.22 | GB<br>(n=190) |       | SF<br>(n=99) |       | GB<br>(n=229) |       | SF<br>(n=96) |       | Feb.22 | GB<br>(n=190) |       | SF<br>(n=99) |       | GB<br>(n=229) |       | SF<br>(n=96) |       |
|        | No.           | %     | No.          | %     | No.           | %     | No.          | %     |        | No.           | %     | No.          | %     | No.           | %     | No.          | %     |
| 1      | 15            | 7.9%  | 18           | 18.2% | 24            | 10.5% | 14           | 14.6% | 1      | 36            | 18.9% | 40           | 40.4% | 50            | 21.8% | 46           | 47.9% |
| 2      | 15            | 7.9%  | 18           | 18.2% | 24            | 10.5% | 14           | 14.6% | 2      | 37            | 19.5% | 44           | 44.4% | 51            | 22.3% | 46           | 47.9% |
| 3      | 15            | 7.9%  | 18           | 18.2% | 24            | 10.5% | 14           | 14.6% | 3      | 39            | 20.5% | 44           | 44.4% | 51            | 22.3% | 48           | 50.0% |
| 4      | 15            | 7.9%  | 18           | 18.2% | 24            | 10.5% | 15           | 15.6% | 4      | 41            | 21.6% | 45           | 45.5% | 51            | 22.3% | 49           | 51.0% |
| 5      | 16            | 8.4%  | 18           | 18.2% | 24            | 10.5% | 15           | 15.6% | 5      | 42            | 22.1% | 46           | 46.5% | 52            | 22.7% | 50           | 52.1% |
| 6      | 16            | 8.4%  | 18           | 18.2% | 24            | 10.5% | 16           | 16.7% | 6      | 42            | 22.1% | 47           | 47.5% | 52            | 22.7% | 52           | 54.2% |
| 7      | 16            | 8.4%  | 19           | 19.2% | 25            | 10.9% | 16           | 16.7% | 7      | 42            | 22.1% | 48           | 48.5% | 54            | 23.6% | 52           | 54.2% |
| 8      | 16            | 8.4%  | 19           | 19.2% | 26            | 11.4% | 17           | 17.7% | 8      | 43            | 22.6% | 51           | 51.5% | 55            | 24.0% | 53           | 55.2% |
| 9      | 17            | 8.9%  | 20           | 20.2% | 27            | 11.8% | 17           | 17.7% | 9      | 45            | 23.7% | 52           | 52.5% | 57            | 24.9% | 53           | 55.2% |
| 10     | 21            | 11.1% | 21           | 21.2% | 27            | 11.8% | 18           | 18.8% | 10     | 47            | 24.7% | 55           | 55.6% | 58            | 25.3% | 54           | 56.3% |
| 11     | 23            | 12.1% | 22           | 22.2% | 27            | 11.8% | 19           | 19.8% | 11     | 47            | 24.7% | 55           | 55.6% | 58            | 25.3% | 54           | 56.3% |
| 12     | 23            | 12.1% | 22           | 22.2% | 27            | 11.8% | 20           | 20.8% | 12     | 49            | 25.8% | 55           | 55.6% | 58            | 25.3% | 54           | 56.3% |
| 13     | 24            | 12.6% | 22           | 22.2% | 27            | 11.8% | 20           | 20.8% | 13     | 51            | 26.8% | 55           | 55.6% | 59            | 25.8% | 54           | 56.3% |
| 14     | 24            | 12.6% | 22           | 22.2% | 27            | 11.8% | 20           | 20.8% | 14     | 52            | 27.4% | 55           | 55.6% | 61            | 26.6% | 54           | 56.3% |
| 15     | 24            | 12.6% | 22           | 22.2% | 30            | 13.1% | 20           | 20.8% | 15     | 52            | 27.4% | 56           | 56.6% | 66            | 28.8% | 54           | 56.3% |
| 16     | 24            | 12.6% | 22           | 22.2% | 30            | 13.1% | 22           | 22.9% | 16     | 52            | 27.4% | 56           | 56.6% | 66            | 28.8% | 54           | 56.3% |
| 17     | 24            | 12.6% | 23           | 23.2% | 33            | 14.4% | 23           | 24.0% | 17     | 55            | 28.9% | 56           | 56.6% | 66            | 28.8% | 54           | 56.3% |
| 18     | 25            | 13.2% | 24           | 24.2% | 34            | 14.8% | 27           | 28.1% | 18     | 56            | 29.5% | 57           | 57.6% | 68            | 29.7% | 54           | 56.3% |
| 19     | 26            | 13.7% | 24           | 24.2% | 37            | 16.2% | 29           | 30.2% | 19     | 59            | 31.1% | 57           | 57.6% | 68            | 29.7% | 54           | 56.3% |
| 20     | 26            | 13.7% | 25           | 25.3% | 39            | 17.0% | 31           | 32.3% | 20     | 63            | 33.2% | 57           | 57.6% | 69            | 30.1% | 54           | 56.3% |
| 21     | 27            | 14.2% | 27           | 27.3% | 40            | 17.5% | 34           | 35.4% | 21     | 65            | 34.2% | 58           | 58.6% | 71            | 31.0% | 54           | 56.3% |
| 22     | 28            | 14.7% | 28           | 28.3% | 40            | 17.5% | 39           | 40.6% | 22     | 67            | 35.3% | 58           | 58.6% | 74            | 32.3% | 55           | 57.3% |
| 23     | 29            | 15.3% | 29           | 29.3% | 40            | 17.5% | 40           | 41.7% | 23     | 67            | 35.3% | 59           | 59.6% | 77            | 33.6% | 55           | 57.3% |
| 24     | 29            | 15.3% | 30           | 30.3% | 40            | 17.5% | 41           | 42.7% | 24     | 67            | 35.3% | 59           | 59.6% | 78            | 34.1% | 55           | 57.3% |
| 25     | 30            | 15.8% | 30           | 30.3% | 41            | 17.9% | 42           | 43.8% | 25     | 69            | 36.3% | 59           | 59.6% | 78            | 34.1% | 55           | 57.3% |
| 26     | 30            | 15.8% | 34           | 34.3% | 41            | 17.9% | 42           | 43.8% | 26     | 69            | 36.3% | 60           | 60.6% | 78            | 34.1% | 55           | 57.3% |
| 27     | 31            | 16.3% | 37           | 37.4% | 42            | 18.3% | 44           | 45.8% | 27     | 69            | 36.3% | 60           | 60.6% | 78            | 34.1% | 55           | 57.3% |
| 28     | 32            | 16.8% | 38           | 38.4% | 42            | 18.3% | 44           | 45.8% | 28     | 70            | 36.8% | 60           | 60.6% | 79            | 34.5% | 55           | 57.3% |
| 29     | 32            | 16.8% | 38           | 38.4% | 43            | 18.8% | 44           | 45.8% |        |               |       |              |       |               |       |              |       |
| 30     | 32            | 16.8% | 38           | 38.4% | 46            | 20.1% | 44           | 45.8% |        |               |       |              |       |               |       |              |       |
| 31     | 33            | 17.4% | 40           | 40.4% | 48            | 21.0% | 45           | 46.9% |        |               |       |              |       |               |       |              |       |

SARS-CoV-2 = severe acute respiratory syndrome coronavirus 2, P3 = period 3 (January 1, 2022 to February 28, 2022), Data are cumulative numbers (No.) and percentages (%) of SARS-CoV-2 infections detected, No. = Number, % = Percentage, Mo. = month, M.S. = middle school (Students aged  $13.1 \pm 1.3$  years old), H.S. = 4-year high school (Students aged  $16.9 \pm 1.2$  years old), GB = students in school classes with a general school branch, SF = students in school classes with sport focus, n = Study population, Jan.22 = January 2022, Feb.22 = February 2022.

**Table S7.** Detailed increase of cumulative numbers and percentage of students with a SARS-CoV-2 infection for P4 (Mar.22 and Apr.22).

| Mo.    | M.S.          |       |              |       | H.S.          |       |              |       | Mo.    | M.S.          |       |              |       | H.S.          |       |              |       |
|--------|---------------|-------|--------------|-------|---------------|-------|--------------|-------|--------|---------------|-------|--------------|-------|---------------|-------|--------------|-------|
| Mar.22 | GB<br>(n=190) |       | SF<br>(n=99) |       | GB<br>(n=229) |       | SF<br>(n=96) |       | Apr.22 | GB<br>(n=190) |       | SF<br>(n=99) |       | GB<br>(n=229) |       | SF<br>(n=96) |       |
|        | No.           | %     | No.          | %     | No.           | %     | No.          | %     |        | No.           | %     | No.          | %     | No.           | %     | No.          | %     |
| 1      | 70            | 36.8% | 61           | 61.6% | 82            | 35.8% | 55           | 57.3% | 1      | 101           | 53.2% | 64           | 64.6% | 115           | 50.2% | 56           | 58.3% |
| 2      | 72            | 37.9% | 61           | 61.6% | 83            | 36.2% | 55           | 57.3% | 2      | 102           | 53.7% | 64           | 64.6% | 115           | 50.2% | 56           | 58.3% |
| 3      | 73            | 38.4% | 61           | 61.6% | 83            | 36.2% | 55           | 57.3% | 3      | 105           | 55.3% | 64           | 64.6% | 115           | 50.2% | 56           | 58.3% |
| 4      | 73            | 38.4% | 62           | 62.6% | 84            | 36.7% | 55           | 57.3% | 4      | 105           | 55.3% | 65           | 65.7% | 115           | 50.2% | 56           | 58.3% |
| 5      | 73            | 38.4% | 62           | 62.6% | 86            | 37.6% | 55           | 57.3% | 5      | 105           | 55.3% | 65           | 65.7% | 115           | 50.2% | 56           | 58.3% |
| 6      | 73            | 38.4% | 62           | 62.6% | 86            | 37.6% | 55           | 57.3% | 6      | 105           | 55.3% | 65           | 65.7% | 116           | 50.7% | 56           | 58.3% |
| 7      | 73            | 38.4% | 62           | 62.6% | 87            | 38.0% | 56           | 58.3% | 7      | 105           | 55.3% | 65           | 65.7% | 117           | 51.1% | 56           | 58.3% |
| 8      | 74            | 38.9% | 62           | 62.6% | 87            | 38.0% | 56           | 58.3% | 8      | 105           | 55.3% | 65           | 65.7% | 118           | 51.5% | 56           | 58.3% |
| 9      | 78            | 41.1% | 62           | 62.6% | 90            | 39.3% | 56           | 58.3% | 9      | 105           | 55.3% | 65           | 65.7% | 118           | 51.5% | 56           | 58.3% |
| 10     | 80            | 42.1% | 62           | 62.6% | 93            | 40.6% | 56           | 58.3% | 10     | 106           | 55.8% | 65           | 65.7% | 118           | 51.5% | 56           | 58.3% |
| 11     | 83            | 43.7% | 62           | 62.6% | 93            | 40.6% | 56           | 58.3% | 11     | 106           | 55.8% | 65           | 65.7% | 118           | 51.5% | 56           | 58.3% |
| 12     | 86            | 45.3% | 62           | 62.6% | 93            | 40.6% | 56           | 58.3% | 12     | 106           | 55.8% | 65           | 65.7% | 118           | 51.5% | 56           | 58.3% |
| 13     | 87            | 45.8% | 62           | 62.6% | 93            | 40.6% | 56           | 58.3% | 13     | 106           | 55.8% | 65           | 65.7% | 118           | 51.5% | 56           | 58.3% |
| 14     | 89            | 46.8% | 62           | 62.6% | 93            | 40.6% | 56           | 58.3% | 14     | 106           | 55.8% | 65           | 65.7% | 119           | 52.0% | 56           | 58.3% |
| 15     | 91            | 47.9% | 62           | 62.6% | 94            | 41.0% | 56           | 58.3% | 15     | 107           | 56.3% | 65           | 65.7% | 119           | 52.0% | 56           | 58.3% |
| 16     | 95            | 50.0% | 62           | 62.6% | 98            | 42.8% | 56           | 58.3% | 16     | 107           | 56.3% | 65           | 65.7% | 119           | 52.0% | 56           | 58.3% |
| 17     | 96            | 50.5% | 62           | 62.6% | 99            | 43.2% | 56           | 58.3% | 17     | 107           | 56.3% | 65           | 65.7% | 119           | 52.0% | 57           | 59.4% |
| 18     | 96            | 50.5% | 62           | 62.6% | 101           | 44.1% | 56           | 58.3% | 18     | 107           | 56.3% | 65           | 65.7% | 119           | 52.0% | 57           | 59.4% |
| 19     | 96            | 50.5% | 62           | 62.6% | 101           | 44.1% | 56           | 58.3% | 19     | 107           | 56.3% | 65           | 65.7% | 120           | 52.4% | 57           | 59.4% |
| 20     | 96            | 50.5% | 62           | 62.6% | 105           | 45.9% | 56           | 58.3% | 20     | 107           | 56.3% | 65           | 65.7% | 121           | 52.8% | 57           | 59.4% |
| 21     | 97            | 51.1% | 62           | 62.6% | 107           | 46.7% | 56           | 58.3% | 21     | 107           | 56.3% | 65           | 65.7% | 121           | 52.8% | 57           | 59.4% |
| 22     | 98            | 51.6% | 62           | 62.6% | 110           | 48.0% | 56           | 58.3% | 22     | 107           | 56.3% | 65           | 65.7% | 121           | 52.8% | 57           | 59.4% |
| 23     | 98            | 51.6% | 63           | 63.6% | 112           | 48.9% | 56           | 58.3% | 23     | 107           | 56.3% | 65           | 65.7% | 121           | 52.8% | 57           | 59.4% |
| 24     | 99            | 52.1% | 63           | 63.6% | 112           | 48.9% | 56           | 58.3% | 24     | 107           | 56.3% | 65           | 65.7% | 121           | 52.8% | 57           | 59.4% |
| 25     | 99            | 52.1% | 63           | 63.6% | 112           | 48.9% | 56           | 58.3% | 25     | 107           | 56.3% | 65           | 65.7% | 122           | 53.3% | 57           | 59.4% |
| 26     | 100           | 52.6% | 63           | 63.6% | 112           | 48.9% | 56           | 58.3% | 26     | 107           | 56.3% | 65           | 65.7% | 122           | 53.3% | 58           | 60.4% |
| 27     | 100           | 52.6% | 63           | 63.6% | 112           | 48.9% | 56           | 58.3% | 27     | 107           | 56.3% | 65           | 65.7% | 122           | 53.3% | 58           | 60.4% |
| 28     | 101           | 53.2% | 63           | 63.6% | 114           | 49.8% | 56           | 58.3% | 28     | 107           | 56.3% | 65           | 65.7% | 122           | 53.3% | 58           | 60.4% |
| 29     | 101           | 53.2% | 64           | 64.6% | 114           | 49.8% | 56           | 58.3% | 29     | 107           | 56.3% | 65           | 65.7% | 122           | 53.3% | 58           | 60.4% |
| 30     | 101           | 53.2% | 64           | 64.6% | 114           | 49.8% | 56           | 58.3% | 30     | 107           | 56.3% | 66           | 66.7% | 122           | 53.3% | 58           | 60.4% |
| 31     | 101           | 53.2% | 64           | 64.6% | 114           | 49.8% | 56           | 58.3% |        |               |       |              |       |               |       |              |       |

SARS-CoV-2 = severe acute respiratory syndrome coronavirus 2, , P4 = period 4 (March 1, 2022 to April 30, 2022), Data are cumulative numbers (No.) and percentages (%) of SARS-CoV-2 infections detected, No. = Number, % = Percentage, Mo. = month, M.S. = middle school (Students aged 13.1 ± 1.3 years old), H.S. = 4-year high school (Students aged 16.9 ± 1.2 years old), GB = students in school classes with a general school branch, SF = students in school classes with sport focus, n = Study population, Mar.22 = March 2022, Apr.22 = April 2022.



**Table S8.** Detailed 7-day incidences for detected SARS-CoV-2 infections for P1 (Sep.21 and Oct.21).

| Mo.    | M.S.          |              | H.S.          |              | AGES  |       | Mo.    | M.S.          |              | H.S.          |              | AGES  |       |
|--------|---------------|--------------|---------------|--------------|-------|-------|--------|---------------|--------------|---------------|--------------|-------|-------|
| Sep.21 | GB<br>(n=190) | SF<br>(n=99) | GB<br>(n=229) | SF<br>(n=96) | I     | II    | Oct.21 | GB<br>(n=190) | SF<br>(n=99) | GB<br>(n=229) | SF<br>(n=96) | I     | II    |
| 1      |               |              |               |              |       |       | 1      | 0.0           | 1010.1       | 436.7         | 0.0          | 422.5 | 197.9 |
| 2      |               |              |               |              |       |       | 2      | 0.0           | 1010.1       | 436.7         | 0.0          | 410.7 | 203.4 |
| 3      |               |              |               |              |       |       | 3      | 0.0           | 1010.1       | 436.7         | 0.0          | 383.0 | 186.8 |
| 4      |               |              |               |              |       |       | 4      | 0.0           | 1010.1       | 0.0           | 0.0          | 363.3 | 172.0 |
| 5      |               |              |               |              |       |       | 5      | 0.0           | 1010.1       | 436.7         | 0.0          | 353.4 | 209.0 |
| 6      |               |              |               |              |       |       | 6      | 0.0           | 0.0          | 436.7         | 0.0          | 317.9 | 212.7 |
| 7      |               |              |               |              |       |       | 7      | 0.0           | 0.0          | 436.7         | 0.0          | 302.1 | 214.5 |
| 8      |               |              |               |              |       |       | 8      | 0.0           | 0.0          | 436.7         | 0.0          | 306.0 | 216.4 |
| 9      |               |              |               |              |       |       | 9      | 0.0           | 0.0          | 436.7         | 0.0          | 300.1 | 223.8 |
| 10     |               |              |               |              |       |       | 10     | 0.0           | 0.0          | 436.7         | 0.0          | 296.2 | 225.6 |
| 11     |               |              |               |              |       |       | 11     | 0.0           | 0.0          | 436.7         | 0.0          | 276.4 | 242.3 |
| 12     |               |              |               |              |       |       | 12     | 0.0           | 0.0          | 0.0           | 0.0          | 246.8 | 227.5 |
| 13     | 0.0           | 0.0          | 0.0           | 0.0          | 207.3 | 183.1 | 13     | 0.0           | 0.0          | 0.0           | 0.0          | 270.5 | 231.2 |
| 14     | 0.0           | 0.0          | 0.0           | 0.0          | 215.2 | 194.2 | 14     | 0.0           | 0.0          | 0.0           | 1041.7       | 266.5 | 240.4 |
| 15     | 0.0           | 0.0          | 0.0           | 0.0          | 256.7 | 214.5 | 15     | 0.0           | 0.0          | 0.0           | 1041.7       | 258.6 | 255.2 |
| 16     | 0.0           | 0.0          | 0.0           | 0.0          | 229.0 | 203.4 | 16     | 0.0           | 0.0          | 0.0           | 1041.7       | 246.8 | 260.8 |
| 17     | 0.0           | 0.0          | 0.0           | 0.0          | 240.9 | 210.8 | 17     | 0.0           | 0.0          | 0.0           | 1041.7       | 256.7 | 273.7 |
| 18     | 0.0           | 0.0          | 0.0           | 0.0          | 225.1 | 197.9 | 18     | 0.0           | 0.0          | 0.0           | 1041.7       | 284.3 | 275.6 |
| 19     | 0.0           | 0.0          | 0.0           | 0.0          | 211.3 | 184.9 | 19     | 0.0           | 0.0          | 0.0           | 1041.7       | 329.7 | 308.9 |
| 20     | 0.0           | 0.0          | 0.0           | 0.0          | 191.5 | 168.3 | 20     | 526.3         | 1010.1       | 436.7         | 1041.7       | 371.2 | 353.2 |
| 21     | 0.0           | 0.0          | 0.0           | 0.0          | 211.3 | 166.4 | 21     | 526.3         | 1010.1       | 436.7         | 0.0          | 402.8 | 336.6 |
| 22     | 0.0           | 0.0          | 0.0           | 0.0          | 201.4 | 144.3 | 22     | 1052.6        | 1010.1       | 436.7         | 0.0          | 438.3 | 371.7 |
| 23     | 0.0           | 0.0          | 0.0           | 1041.7       | 223.1 | 138.7 | 23     | 1052.6        | 1010.1       | 436.7         | 0.0          | 535.1 | 416.1 |
| 24     | 0.0           | 0.0          | 0.0           | 1041.7       | 217.2 | 135.0 | 24     | 1052.6        | 1010.1       | 436.7         | 0.0          | 556.8 | 419.8 |
| 25     | 0.0           | 0.0          | 0.0           | 1041.7       | 258.6 | 138.7 | 25     | 1052.6        | 1010.1       | 436.7         | 0.0          | 645.6 | 442.0 |
| 26     | 0.0           | 0.0          | 0.0           | 1041.7       | 294.2 | 162.7 | 26     | 1052.6        | 1010.1       | 436.7         | 0.0          | 695.0 | 445.7 |
| 27     | 0.0           | 0.0          | 436.7         | 1041.7       | 337.6 | 184.9 | 27     | 526.3         | 0.0          | 0.0           | 1041.7       | 671.3 | 455.0 |
| 28     | 0.0           | 0.0          | 436.7         | 1041.7       | 367.2 | 184.9 | 28     | 526.3         | 0.0          | 436.7         | 1041.7       | 750.3 | 543.7 |
| 29     | 0.0           | 1010.1       | 436.7         | 1041.7       | 400.8 | 199.7 | 29     | 0.0           | 0.0          | 436.7         | 1041.7       | 825.3 | 580.7 |
| 30     | 0.0           | 1010.1       | 436.7         | 0.0          | 422.5 | 203.4 | 30     | 0.0           | 0.0          | 436.7         | 1041.7       | 811.5 | 601.1 |
|        |               |              |               |              |       |       | 31     | 0.0           | 0.0          | 436.7         | 1041.7       | 825.3 | 615.9 |

SARS-CoV-2 = severe acute respiratory syndrome coronavirus 2, P1 = period 1 (September 13, 2021 to October 31, 2021), Data are raw daily 7-day incidences extrapolated to 100,000 persons, Mo. = month, M.S. = middle school (students aged  $13.1 \pm 1.3$  years old), H.S. = 4-year high school (students aged  $16.9 \pm 1.2$  years old), AGES = Austrian Agency for Health and Food Safety, GB = students in school classes with a general school branch, SF = students in school classes with sport focus, I = 7 days incidence for SARS-CoV-2 infections per 100,000 inhabitants in Carinthia (AUT) for children aged 5 to 14 years (<https://covid19-dashboard.ages.at/>), II = 7 days incidence for SARS-CoV-2 infections per 100,000 inhabitants in Carinthia (AUT) for adolescent aged 15 to 24 years (<https://covid19-dashboard.ages.at/>), AUT = Austria, n = Study population, Sep.21 = September 2021, Oct.21 = October 2021.

**Table S9.** Detailed 7-day incidences for detected SARS-CoV-2 infections for P2 (Nov.21 and Dec.21).

| Mo.    | M.S.          |              | H.S.          |              | AGES   |        | Mo.    | M.S.          |              | H.S.          |              | AGES   |        |
|--------|---------------|--------------|---------------|--------------|--------|--------|--------|---------------|--------------|---------------|--------------|--------|--------|
| Nov.21 | GB<br>(n=190) | SF<br>(n=99) | GB<br>(n=229) | SF<br>(n=96) | I      | II     | Dec.21 | GB<br>(n=190) | SF<br>(n=99) | GB<br>(n=229) | SF<br>(n=96) | I      | II     |
| 1      | 0.0           | 1010.1       | 436.7         | 1041.7       | 813.4  | 630.7  | 1      | 2105.3        | 6060.6       | 436.7         | 1041.7       | 3161.0 | 1387.1 |
| 2      | 0.0           | 2020.2       | 436.7         | 1041.7       | 795.7  | 634.4  | 2      | 1579.0        | 3030.3       | 436.7         | 1041.7       | 2657.5 | 1209.5 |
| 3      | 0.0           | 3030.3       | 436.7         | 1041.7       | 801.6  | 686.1  | 3      | 1052.6        | 1010.1       | 0.0           | 0.0          | 2221.2 | 1070.8 |
| 4      | 526.3         | 3030.3       | 436.7         | 1041.7       | 894.4  | 828.5  | 4      | 1052.6        | 1010.1       | 0.0           | 0.0          | 1842.1 | 934.0  |
| 5      | 526.3         | 3030.3       | 1310.0        | 2083.3       | 943.8  | 941.4  | 5      | 1052.6        | 1010.1       | 436.7         | 0.0          | 1642.7 | 832.2  |
| 6      | 526.3         | 3030.3       | 1310.0        | 3125.0       | 937.8  | 1050.5 | 6      | 1579.0        | 1010.1       | 873.4         | 0.0          | 1453.1 | 786.0  |
| 7      | 526.3         | 3030.3       | 1746.7        | 3125.0       | 959.5  | 1142.9 | 7      | 1052.6        | 1010.1       | 1310.0        | 0.0          | 1230.0 | 686.1  |
| 8      | 526.3         | 3030.3       | 2183.4        | 4166.7       | 973.4  | 1274.3 | 8      | 526.3         | 1010.1       | 1310.0        | 0.0          | 937.8  | 619.6  |
| 9      | 526.3         | 2020.2       | 2183.4        | 5208.3       | 1066.2 | 1355.6 | 9      | 526.3         | 1010.1       | 1310.0        | 0.0          | 764.1  | 541.9  |
| 10     | 526.3         | 1010.1       | 2620.1        | 5208.3       | 1551.9 | 1644.1 | 10     | 1052.6        | 1010.1       | 1746.7        | 0.0          | 856.9  | 562.2  |
| 11     | 0.0           | 1010.1       | 3056.8        | 5208.3       | 1555.8 | 1614.5 | 11     | 1579.0        | 1010.1       | 1746.7        | 0.0          | 740.4  | 525.2  |
| 12     | 526.3         | 1010.1       | 2183.4        | 4166.7       | 1561.7 | 1614.5 | 12     | 1579.0        | 1010.1       | 1310.0        | 0.0          | 738.4  | 530.8  |
| 13     | 1052.6        | 1010.1       | 2183.4        | 3125.0       | 1660.4 | 1551.7 | 13     | 1579.0        | 0.0          | 1746.7        | 0.0          | 661.4  | 471.6  |
| 14     | 1052.6        | 1010.1       | 2183.4        | 3125.0       | 1737.4 | 1548.0 | 14     | 1579.0        | 0.0          | 1310.0        | 0.0          | 576.5  | 408.7  |
| 15     | 1579.0        | 0.0          | 2183.4        | 3125.0       | 1891.4 | 1549.8 | 15     | 2105.3        | 0.0          | 1310.0        | 0.0          | 616.0  | 379.1  |
| 16     | 1579.0        | 1010.1       | 2183.4        | 2083.3       | 2084.9 | 1670.0 | 16     | 2105.3        | 0.0          | 1310.0        | 0.0          | 647.6  | 384.7  |
| 17     | 1579.0        | 1010.1       | 2183.4        | 1041.7       | 2460.1 | 1651.5 | 17     | 1579.0        | 0.0          | 873.4         | 0.0          | 501.5  | 329.2  |
| 18     | 1579.0        | 1010.1       | 1746.7        | 1041.7       | 2851.0 | 1832.8 | 18     | 1052.6        | 0.0          | 873.4         | 0.0          | 493.6  | 295.9  |
| 19     | 1052.6        | 1010.1       | 2183.4        | 2083.3       | 3054.4 | 1890.1 | 19     | 1052.6        | 0.0          | 873.4         | 0.0          | 466.0  | 260.8  |
| 20     | 526.3         | 1010.1       | 2183.4        | 4166.7       | 3324.8 | 2051.0 | 20     | 526.3         | 0.0          | 0.0           | 0.0          | 454.1  | 233.0  |
| 21     | 526.3         | 1010.1       | 1746.7        | 4166.7       | 3340.6 | 1997.4 | 21     | 526.3         | 0.0          | 0.0           | 0.0          | 446.2  | 227.5  |
| 22     | 0.0           | 1010.1       | 1310.0        | 3125.0       | 3372.2 | 1986.3 | 22     | 0.0           | 0.0          | 0.0           | 0.0          | 430.4  | 197.9  |
| 23     | 0.0           | 0.0          | 1310.0        | 3125.0       | 3295.2 | 1871.6 | 23     | 0.0           | 0.0          | 0.0           | 0.0          | 438.3  | 188.6  |
| 24     | 0.0           | 3030.3       | 873.4         | 3125.0       | 3228.1 | 1786.5 | 24     | 0.0           | 0.0          | 0.0           | 0.0          | 394.9  | 157.2  |
| 25     | 526.3         | 6060.6       | 436.7         | 3125.0       | 3279.4 | 1653.4 | 25     | 0.0           | 0.0          | 0.0           | 0.0          | 359.3  | 146.1  |
| 26     | 1052.6        | 8080.8       | 436.7         | 3125.0       | 3435.4 | 1585.0 | 26     | 0.0           | 1010.1       | 0.0           | 0.0          | 357.4  | 166.4  |
| 27     | 1052.6        | 8080.8       | 436.7         | 1041.7       | 3514.4 | 1505.4 | 27     | 0.0           | 1010.1       | 0.0           | 0.0          | 359.3  | 172.0  |
| 28     | 1052.6        | 8080.8       | 436.7         | 1041.7       | 3609.2 | 1572.0 | 28     | 0.0           | 1010.1       | 0.0           | 0.0          | 333.7  | 186.8  |
| 29     | 1052.6        | 9090.9       | 436.7         | 1041.7       | 3605.2 | 1527.6 | 29     | 0.0           | 2020.2       | 0.0           | 0.0          | 260.6  | 192.3  |
| 30     | 1579.0        | 9090.9       | 436.7         | 1041.7       | 3662.5 | 1551.7 | 30     | 0.0           | 2020.2       | 0.0           | 0.0          | 252.7  | 210.8  |
|        |               |              |               |              |        |        | 31     | 0.0           | 2020.2       | 0.0           | 0.0          | 274.4  | 231.2  |

SARS-CoV-2 = severe acute respiratory syndrome coronavirus 2, P2 = period 2 (November 1, 2021 to December 31, 2021), Data are raw daily 7-day incidences extrapolated to 100,000 persons, Mo. = month, M.S. = middle school (students aged  $13.1 \pm 1.3$  years old), H.S. = 4-year high school (students aged  $16.9 \pm 1.2$  years old), AGES = Austrian Agency for Health and Food Safety, GB = students in school classes with a general school branch, SF = students in school classes with sport focus, I = 7 days incidence for SARS-CoV-2 infections per 100,000 inhabitants in Carinthia (AUT) for children aged 5 to 14 years (<https://covid19-dashboard.ages.at/>), II = 7 days incidence for SARS-CoV-2 infections per 100,000 inhabitants in Carinthia (AUT) for adolescent aged 15 to 24 years (<https://covid19-dashboard.ages.at/>), AUT = Austria, n = Study population, Nov.21 = November 2021, Dec.21 = December 2021.

**Table S10.** Detailed 7-day incidences for detected SARS-CoV-2 infections for P3 (Jan.22 and Feb.22).

| Mo.    | M.S.          |              | H.S.          |              | AGES   |        | Mo.    | M.S.          |              | H.S.          |              | AGES   |        |
|--------|---------------|--------------|---------------|--------------|--------|--------|--------|---------------|--------------|---------------|--------------|--------|--------|
| Jan.22 | GB<br>(n=190) | SF<br>(n=99) | GB<br>(n=229) | SF<br>(n=96) | I      | II     | Feb.22 | GB<br>(n=190) | SF<br>(n=99) | GB<br>(n=229) | SF<br>(n=96) | I      | II     |
| 1      | 0.0           | 2020.2       | 436.7         | 1041.7       | 260.6  | 240.4  | 1      | 3684.2        | 11111.1      | 3930.1        | 7291.7       | 4282.4 | 3238.3 |
| 2      | 0.0           | 1010.1       | 436.7         | 1041.7       | 260.6  | 227.5  | 2      | 4210.5        | 11111.1      | 4366.8        | 8333.3       | 4207.4 | 3258.7 |
| 3      | 0.0           | 1010.1       | 436.7         | 2083.3       | 238.9  | 257.1  | 3      | 4736.8        | 8080.8       | 3930.1        | 6250.0       | 4262.7 | 3184.7 |
| 4      | 0.0           | 1010.1       | 436.7         | 2083.3       | 258.6  | 369.9  | 4      | 5263.2        | 8080.8       | 3930.1        | 7291.7       | 4641.8 | 3454.7 |
| 5      | 526.3         | 0.0          | 873.4         | 2083.3       | 292.2  | 519.7  | 5      | 5789.5        | 9090.9       | 4366.8        | 7291.7       | 4866.8 | 3711.8 |
| 6      | 526.3         | 0.0          | 1310.0        | 2083.3       | 321.8  | 654.7  | 6      | 5789.5        | 10101.0      | 3056.8        | 8333.3       | 5074.1 | 3904.1 |
| 7      | 526.3         | 1010.1       | 1746.7        | 2083.3       | 347.5  | 712.0  | 7      | 5263.2        | 8080.8       | 3056.8        | 5208.3       | 5127.4 | 3867.1 |
| 8      | 526.3         | 1010.1       | 1746.7        | 2083.3       | 408.7  | 865.5  | 8      | 4210.5        | 11111.1      | 2620.1        | 5208.3       | 5528.2 | 4218.5 |
| 9      | 1052.6        | 2020.2       | 2183.4        | 2083.3       | 456.1  | 950.6  | 9      | 4736.8        | 8080.8       | 3493.5        | 4166.7       | 5873.8 | 4446.0 |
| 10     | 3157.9        | 3030.3       | 2183.4        | 2083.3       | 586.4  | 1109.7 | 10     | 4210.5        | 11111.1      | 3930.1        | 5208.3       | 5794.8 | 4532.9 |
| 11     | 4210.5        | 4040.4       | 2183.4        | 3125.0       | 758.2  | 1213.2 | 11     | 3157.9        | 11111.1      | 3930.1        | 4166.7       | 5348.6 | 4270.3 |
| 12     | 3684.2        | 4040.4       | 1746.7        | 4166.7       | 807.5  | 1248.4 | 12     | 3684.2        | 10101.0      | 3056.8        | 4166.7       | 4924.1 | 4016.9 |
| 13     | 4210.5        | 4040.4       | 1310.0        | 5208.3       | 935.9  | 1294.6 | 13     | 4736.8        | 9090.9       | 3493.5        | 2083.3       | 4714.8 | 3885.6 |
| 14     | 4210.5        | 3030.3       | 873.4         | 5208.3       | 1028.6 | 1388.9 | 14     | 5263.2        | 8080.8       | 3493.5        | 2083.3       | 4507.5 | 3918.9 |
| 15     | 4210.5        | 3030.3       | 1746.7        | 6250.0       | 1129.3 | 1416.7 | 15     | 5263.2        | 6060.6       | 5240.2        | 1041.7       | 3753.3 | 3476.9 |
| 16     | 3684.2        | 2020.2       | 1310.0        | 10416.7      | 1239.9 | 1470.3 | 16     | 4210.5        | 5050.5       | 3930.1        | 1041.7       | 3016.8 | 3208.7 |
| 17     | 1579.0        | 2020.2       | 2620.1        | 10416.7      | 1342.6 | 1477.7 | 17     | 4736.8        | 2020.2       | 3493.5        | 0.0          | 2521.3 | 3001.6 |
| 18     | 1052.6        | 2020.2       | 3056.8        | 11458.3      | 1504.5 | 1631.2 | 18     | 5263.2        | 2020.2       | 4366.8        | 0.0          | 2270.5 | 2890.6 |
| 19     | 1579.0        | 2020.2       | 4366.8        | 13541.7      | 1836.2 | 1768.0 | 19     | 5789.5        | 2020.2       | 4366.8        | 1041.7       | 2246.8 | 2850.0 |
| 20     | 1052.6        | 3030.3       | 5240.2        | 14583.3      | 2071.1 | 1919.7 | 20     | 6842.1        | 2020.2       | 4366.8        | 1041.7       | 2260.7 | 2781.5 |
| 21     | 1579.0        | 5050.5       | 5676.9        | 18750.0      | 2631.8 | 2243.3 | 21     | 7368.4        | 3030.3       | 4366.8        | 1041.7       | 2321.9 | 2740.8 |
| 22     | 2105.3        | 6060.6       | 4366.8        | 19791.7      | 2825.3 | 2346.9 | 22     | 7894.7        | 2020.2       | 3493.5        | 1041.7       | 2689.1 | 2905.4 |
| 23     | 2631.6        | 7070.7       | 4366.8        | 16666.7      | 2983.3 | 2485.6 | 23     | 7894.7        | 3030.3       | 4803.5        | 1041.7       | 2935.9 | 2905.4 |
| 24     | 2631.6        | 7070.7       | 3056.8        | 15625.0      | 3082.0 | 2544.8 | 24     | 6315.8        | 3030.3       | 5676.9        | 1041.7       | 2977.4 | 2944.3 |
| 25     | 2631.6        | 6060.6       | 3056.8        | 14583.3      | 3482.8 | 2698.3 | 25     | 6842.1        | 2020.2       | 5240.2        | 1041.7       | 3208.4 | 3084.8 |
| 26     | 2105.3        | 10101.0      | 1746.7        | 11458.3      | 3816.5 | 2872.1 | 26     | 5263.2        | 3030.3       | 5240.2        | 0.0          | 3172.8 | 2977.6 |
| 27     | 3157.9        | 12121.2      | 1310.0        | 11458.3      | 4280.4 | 3158.8 | 27     | 3157.9        | 3030.3       | 4803.5        | 0.0          | 3149.1 | 2938.7 |
| 28     | 3157.9        | 11111.1      | 873.4         | 7291.7       | 4185.7 | 3105.2 | 28     | 2631.6        | 2020.2       | 4366.8        | 0.0          | 3101.7 | 2931.3 |
| 29     | 2631.6        | 10101.0      | 1310.0        | 4166.7       | 4302.2 | 3171.8 |        |               |              |               |              |        |        |
| 30     | 2105.3        | 9090.9       | 2620.1        | 4166.7       | 4239.0 | 3155.1 |        |               |              |               |              |        |        |
| 31     | 2631.6        | 11111.1      | 3493.5        | 7291.7       | 4339.7 | 3260.5 |        |               |              |               |              |        |        |

SARS-CoV-2 = severe acute respiratory syndrome coronavirus 2, , P3 = period 3 (January 1, 2022 to February 28, 2022), Data are raw daily 7-day incidences extrapolated to 100,000 persons, Mo. = month, M.S. = middle school (students aged  $13.1 \pm 1.3$  years old), H.S. = 4-year high school (students aged  $16.9 \pm 1.2$  years old), AGES = Austrian Agency for Health and Food Safety, GB = students in school classes with a general school branch, SF = students in school classes with sport focus, I = 7 days incidence for SARS-CoV-2 infections per 100,000 inhabitants in Carinthia (AUT) for children aged 5 to 14 years (<https://covid19-dashboard.ages.at/>), II = 7 days incidence for SARS-CoV-2 infections per 100,000 inhabitants in Carinthia (AUT) for adolescent aged 15 to 24 years (<https://covid19-dashboard.ages.at/>), AUT = Austria, n = Study population, Jan.22 = January 2022, Feb.22 = February 2022.

**Table S11.** Detailed 7-day incidences for detected SARS-CoV-2 infections for P4 (Mar.22 and Apr.22).

| Mo.    | M.S.          |              | H.S.          |              | AGES   |        | Mo.    | M.S.          |              | H.S.          |              | AGES   |        |
|--------|---------------|--------------|---------------|--------------|--------|--------|--------|---------------|--------------|---------------|--------------|--------|--------|
| Mar.22 | GB<br>(n=190) | SF<br>(n=99) | GB<br>(n=229) | SF<br>(n=96) | I      | II     | Apr.22 | GB<br>(n=190) | SF<br>(n=99) | GB<br>(n=229) | SF<br>(n=96) | I      | II     |
| 1      | 1579.0        | 3030.3       | 4803.5        | 0.0          | 3018.8 | 2877.7 | 1      | 1052.6        | 2020.2       | 1746.7        | 1041.7       | 1891.4 | 1686.7 |
| 2      | 2631.6        | 2020.2       | 3930.1        | 0.0          | 3403.8 | 3001.6 | 2      | 1052.6        | 2020.2       | 1746.7        | 1041.7       | 1842.1 | 1579.4 |
| 3      | 3157.9        | 2020.2       | 3056.8        | 0.0          | 3474.9 | 3058.9 | 3      | 2631.6        | 2020.2       | 1746.7        | 1041.7       | 1776.9 | 1475.8 |
| 4      | 2105.3        | 3030.3       | 3056.8        | 1041.7       | 3747.4 | 3138.5 | 4      | 2105.3        | 3030.3       | 873.4         | 1041.7       | 1660.4 | 1351.9 |
| 5      | 2105.3        | 2020.2       | 3930.1        | 1041.7       | 3861.9 | 3279.0 | 5      | 2105.3        | 2020.2       | 873.4         | 2083.3       | 1563.7 | 1270.6 |
| 6      | 2105.3        | 2020.2       | 3930.1        | 1041.7       | 3913.2 | 3297.5 | 6      | 2105.3        | 2020.2       | 1310.0        | 1041.7       | 1350.5 | 1091.2 |
| 7      | 1579.0        | 2020.2       | 3930.1        | 1041.7       | 4102.7 | 3373.3 | 7      | 2105.3        | 2020.2       | 1746.7        | 1041.7       | 1283.3 | 1000.5 |
| 8      | 2105.3        | 1010.1       | 2183.4        | 1041.7       | 4539.1 | 3669.2 | 8      | 2105.3        | 1010.1       | 1310.0        | 1041.7       | 1082.0 | 882.2  |
| 9      | 3157.9        | 1010.1       | 3056.8        | 1041.7       | 4477.9 | 3978.1 | 9      | 1579.0        | 1010.1       | 1310.0        | 1041.7       | 1056.3 | 869.2  |
| 10     | 3684.2        | 1010.1       | 4366.8        | 1041.7       | 4612.1 | 4266.6 | 10     | 526.3         | 1010.1       | 1310.0        | 1041.7       | 1024.7 | 832.2  |
| 11     | 5263.2        | 0.0          | 3930.1        | 0.0          | 4675.3 | 4488.5 | 11     | 526.3         | 0.0          | 1310.0        | 1041.7       | 981.3  | 795.3  |
| 12     | 6842.1        | 0.0          | 3056.8        | 0.0          | 4734.5 | 4625.4 | 12     | 526.3         | 0.0          | 1310.0        | 0.0          | 675.2  | 630.7  |
| 13     | 6842.1        | 0.0          | 3056.8        | 0.0          | 4805.6 | 4725.3 | 13     | 526.3         | 0.0          | 873.4         | 0.0          | 519.3  | 536.3  |
| 14     | 8421.1        | 0.0          | 2620.1        | 0.0          | 4740.5 | 4778.9 | 14     | 526.3         | 0.0          | 873.4         | 0.0          | 493.6  | 499.3  |
| 15     | 8947.4        | 0.0          | 3493.5        | 0.0          | 4647.7 | 4817.7 | 15     | 1052.6        | 0.0          | 436.7         | 0.0          | 351.4  | 427.2  |
| 16     | 8947.4        | 0.0          | 4366.8        | 0.0          | 4849.1 | 4814.0 | 16     | 1052.6        | 0.0          | 436.7         | 0.0          | 333.7  | 386.5  |
| 17     | 8421.1        | 0.0          | 3493.5        | 0.0          | 4701.0 | 4630.9 | 17     | 526.3         | 0.0          | 436.7         | 1041.7       | 319.8  | 368.0  |
| 18     | 7368.4        | 0.0          | 4366.8        | 0.0          | 4651.6 | 4514.4 | 18     | 526.3         | 0.0          | 436.7         | 1041.7       | 315.9  | 364.3  |
| 19     | 5789.5        | 0.0          | 4366.8        | 0.0          | 4556.9 | 4396.1 | 19     | 526.3         | 0.0          | 873.4         | 1041.7       | 331.7  | 331.0  |
| 20     | 5789.5        | 0.0          | 6113.5        | 0.0          | 4432.5 | 4360.9 | 20     | 526.3         | 0.0          | 1310.0        | 1041.7       | 475.8  | 408.7  |
| 21     | 4736.8        | 1010.1       | 7423.6        | 0.0          | 4306.1 | 4296.2 | 21     | 526.3         | 0.0          | 873.4         | 1041.7       | 467.9  | 412.4  |
| 22     | 4210.5        | 1010.1       | 7860.3        | 0.0          | 4183.7 | 4081.7 | 22     | 0.0           | 0.0          | 873.4         | 1041.7       | 489.6  | 432.8  |
| 23     | 2105.3        | 2020.2       | 6550.2        | 0.0          | 3761.2 | 3650.8 | 23     | 0.0           | 0.0          | 873.4         | 2083.3       | 483.7  | 421.7  |
| 24     | 2105.3        | 2020.2       | 6113.5        | 0.0          | 3696.0 | 3382.6 | 24     | 0.0           | 0.0          | 873.4         | 1041.7       | 481.7  | 432.8  |
| 25     | 1579.0        | 2020.2       | 5240.2        | 0.0          | 3194.5 | 3040.4 | 25     | 0.0           | 0.0          | 1310.0        | 1041.7       | 501.5  | 427.2  |
| 26     | 2105.3        | 2020.2       | 5240.2        | 0.0          | 3034.6 | 2861.1 | 26     | 0.0           | 0.0          | 873.4         | 1041.7       | 517.3  | 440.2  |
| 27     | 2105.3        | 2020.2       | 3493.5        | 0.0          | 2890.5 | 2718.6 | 27     | 0.0           | 0.0          | 436.7         | 1041.7       | 404.7  | 356.9  |
| 28     | 2105.3        | 1010.1       | 3056.8        | 0.0          | 2787.8 | 2537.4 | 28     | 0.0           | 0.0          | 436.7         | 1041.7       | 430.4  | 351.4  |
| 29     | 1579.0        | 2020.2       | 1746.7        | 0.0          | 2351.5 | 2171.2 | 29     | 0.0           | 0.0          | 436.7         | 1041.7       | 424.5  | 318.1  |
| 30     | 1579.0        | 1010.1       | 873.4         | 1041.7       | 2100.7 | 1997.4 | 30     | 0.0           | 1010.1       | 436.7         | 0.0          | 446.2  | 303.3  |
| 31     | 1052.6        | 1010.1       | 873.4         | 1041.7       | 1838.1 | 1784.7 |        |               |              |               |              |        |        |

SARS-CoV-2 = severe acute respiratory syndrome coronavirus 2, , P4 = period 4 (March 1, 2022 to April 30, 2022), Data are raw daily 7-day incidences extrapolated to 100,000 persons, Mo. = month, M.S. = middle school (students aged  $13.1 \pm 1.3$  years old), H.S. = 4-year high school (students aged  $16.9 \pm 1.2$  years old), AGES = Austrian Agency for Health and Food Safety, GB = students in school classes with a general school branch, SF = students in school classes with sport focus, I = 7 days incidence for SARS-CoV-2 infections per 100,000 inhabitants in Carinthia (AUT) for children aged 5 to 14 years (<https://covid19-dashboard.ages.at/>), II = 7 days incidence for SARS-CoV-2 infections per 100,000 inhabitants in Carinthia (AUT) for adolescent aged 15 to 24 years (<https://covid19-dashboard.ages.at/>), AUT = Austria, n = Study population, Mar.22 = March 2022, Apr.22 = April 2022.

**Table S12.** Potential SARS-CoV-2 infection in school classes GB vs. SF classes, using hypothesized generation time - 2 days.

| Time Period | school grade | Category   | HTPPI = GT 2D |     |                    |                      |           |      |                      |
|-------------|--------------|------------|---------------|-----|--------------------|----------------------|-----------|------|----------------------|
|             |              |            | PI, No.       |     | X <sup>2</sup>     | P Value <sup>b</sup> | P-<br>lvl | φ    | OR (95%CI)           |
|             |              |            | yes           | no  |                    |                      |           |      |                      |
| P1          | All (n=614)  | GB (n=419) | 0             | 419 | INC                |                      |           |      |                      |
|             |              | SF (n=185) | 0             | 195 |                    |                      |           |      |                      |
|             | M.S. (n=289) | GB (n=190) | 0             | 190 | INC                |                      |           |      |                      |
|             |              | SF (n=99)  | 0             | 99  |                    |                      |           |      |                      |
|             | H.S. (n=325) | GB (n=229) | 0             | 229 | INC                |                      |           |      |                      |
|             |              | SF (n=96)  | 0             | 96  |                    |                      |           |      |                      |
| P2          | All (n=614)  | GB (n=419) | 3             | 416 | 6.859 <sup>a</sup> | 0.014                | *         | 0.11 | 5.16 (1.32 to 20.19) |
|             |              | SF (n=185) | 7             | 188 |                    |                      |           |      |                      |
|             | M.S. (n=289) | GB (n=190) | 0             | 190 | INC                |                      |           |      |                      |
|             |              | SF (n=99)  | 5             | 94  |                    |                      |           |      |                      |
|             | H.S. (n=325) | GB (n=229) | 3             | 226 | 0.267 <sup>a</sup> | 0.63                 |           | 0.03 | 1.60 (0.26 to 9.75)  |
|             |              | SF (n=96)  | 2             | 94  |                    |                      |           |      |                      |
| P3          | All (n=614)  | GB (n=419) | 26            | 393 | 30.066             | <.001                | ***       | 0.22 | 4.02 (2.38 to 6.81)  |
|             |              | SF (n=185) | 41            | 154 |                    |                      |           |      |                      |
|             | M.S. (n=289) | GB (n=190) | 12            | 178 | 15.864             | <.001                | ***       | 0.23 | 4.24 (2.00 to 8.99)  |
|             |              | SF (n=99)  | 22            | 77  |                    |                      |           |      |                      |
|             | H.S. (n=325) | GB (n=229) | 14            | 215 | 13.872             | <.001                | ***       | 0.21 | 3.79 (1.81 to 7.93)  |
|             |              | SF (n=96)  | 19            | 77  |                    |                      |           |      |                      |
| P4          | All (n=614)  | GB (n=419) | 28            | 391 | INC                |                      |           |      |                      |
|             |              | SF (n=185) | 0             | 195 |                    |                      |           |      |                      |
|             | M.S. (n=289) | GB (n=190) | 14            | 176 | INC                |                      |           |      |                      |
|             |              | SF (n=99)  | 0             | 99  |                    |                      |           |      |                      |
|             | H.S. (n=325) | GB (n=229) | 14            | 215 | INC                |                      |           |      |                      |
| SF (n=96)   |              | 0          | 96            |     |                    |                      |           |      |                      |

a = 1 cell (25%) or 2 cells (50,0%) have expected count less than 5; b = If ( a ) occurred, Fisher's Exact Test was used.

SARS-CoV-2 = severe acute respiratory syndrome coronavirus 2, HTPPI = hypothetical time period assumed for potential infections, GT = generation time, D = days, PI = potential infection, No = absolute Number of children, X<sup>2</sup> = Chi-Square Test value, φ = Effect size Phi, p-lvl (P Value level) \* = P < 0.05, \*\* = P < 0.01, \*\*\* = P < 0.001, p-lvl = significance level, OR = Odds ratio for potential SARS-CoV-2 infection in school classes with sport focus vs. school classes without sport focus, using different hypothesized generation time (with 1 for students in classes without sport focus), CI = Confidence Interval, P1 = period 1 (September 13, 2021 to October 31, 2021) P2 = period 2 (November 1, 2021 to December 31, 2021), P3 = period 3 (January 1, 2022 to February 28, 2022), P4 = period 4 (March 1, 2022 to April 30, 2022), M.S. = middle school (students aged 13.1 ± 1.3 years old), H.S. = 4-year high school (students aged 16.9 ± 1.2 years old), GB = students in school classes with a general school branch, SF = students in school classes with sport focus, n = Study population, INC = insufficient number of potential infection cases.

**Table S13.** Potential SARS-CoV-2 infection in school classes GB vs. SF classes, using hypothesized generation time - 4 days.

| Time Period | school grade    | Category   | HTPPI = GT 4D |     |                    |                      |       |       |                        |
|-------------|-----------------|------------|---------------|-----|--------------------|----------------------|-------|-------|------------------------|
|             |                 |            | PI, No.       |     | X <sup>2</sup>     | P Value <sup>b</sup> | p-lvl | φ     | OR (95%CI)             |
|             |                 |            | ye<br>s       | no  |                    |                      |       |       |                        |
| P1          | All<br>(n=614)  | GB (n=419) | 0             | 419 | INC                |                      |       |       |                        |
|             |                 | SF (n=185) | 0             | 195 |                    |                      |       |       |                        |
|             | M.S.<br>(n=289) | GB (n=190) | 0             | 190 | INC                |                      |       |       |                        |
|             |                 | SF (n=99)  | 0             | 99  |                    |                      |       |       |                        |
|             | H.S.<br>(n=325) | GB (n=229) | 0             | 229 | INC                |                      |       |       |                        |
|             |                 | SF (n=96)  | 0             | 96  |                    |                      |       |       |                        |
| P2          | All<br>(n=614)  | GB (n=419) | 8             | 411 | 4.845              | 0.028                | *     | 0.09  | 2.78 (1.08 to 7.15)    |
|             |                 | SF (n=185) | 10            | 185 |                    |                      |       |       |                        |
|             | M.S.<br>(n=289) | GB (n=190) | 1             | 189 | 8.435 <sup>a</sup> | 0.007                | **    | 0.17  | 12.19 (1.45 to 102.76) |
|             |                 | SF (n=99)  | 6             | 93  |                    |                      |       |       |                        |
|             | H.S.<br>(n=325) | GB (n=229) | 7             | 222 | 0.255 <sup>a</sup> | 0.74                 |       | 0.03  | 1.38 (0.39 to 4.82)    |
|             |                 | SF (n=96)  | 4             | 92  |                    |                      |       |       |                        |
| P3          | All<br>(n=614)  | GB (n=419) | 39            | 380 | 40.042             | <.001                | ***   | 0.26  | 4.03 (2.56 to 6.31)    |
|             |                 | SF (n=185) | 57            | 138 |                    |                      |       |       |                        |
|             | M.S.<br>(n=289) | GB (n=190) | 18            | 172 | 17.205             | <.001                | ***   | 0.24  | 3.77 (1.96 to 7.24)    |
|             |                 | SF (n=99)  | 28            | 71  |                    |                      |       |       |                        |
|             | H.S.<br>(n=325) | GB (n=229) | 21            | 208 | 22.998             | <.001                | ***   | 0.27  | 4.29 (2.29 to 8.01)    |
|             |                 | SF (n=96)  | 29            | 67  |                    |                      |       |       |                        |
| P4          | All<br>(n=614)  | GB (n=419) | 37            | 382 | 15.857             | <.001                | ***   | -0.16 | 0.05 (0.01 to 0.39)    |
|             |                 | SF (n=185) | 1             | 194 |                    |                      |       |       |                        |
|             | M.S.<br>(n=289) | GB (n=190) | 17            | 173 | 7.021              | 0.008                | **    | -0.16 | 0.10 (0.01 to 0.79)    |
|             |                 | SF (n=99)  | 1             | 98  |                    |                      |       |       |                        |
|             | H.S.<br>(n=325) | GB (n=229) | 20            | 209 | 8.934              | 0.003                | **    | -0.16 | 0.10 (0.01 to 0.79)    |
|             |                 | SF (n=96)  | 0             | 96  |                    |                      |       |       |                        |

a = 1 cell (25%) or 2 cells (50,0%) have expected count less than 5; b = If ( a ) occurred, Fisher's Exact Test was used.

SARS-CoV-2 = severe acute respiratory syndrome coronavirus 2, HTPPI = hypothetical time period assumed for potential infections, GT = generation time, D = days, PI = potential infection, No = absolute Number of children, X<sup>2</sup> = Chi-Square Test value, φ = Effect size Phi, p-lvl (P Value level) \* = P < 0.05, \*\* = P < 0.01, \*\*\* = P < 0.001, p-lvl = significance level, OR = Odds ratio for potential SARS-CoV-2 infection in school classes with sport focus vs. school classes without sport focus, using different hypothesized generation time (with 1 for students in classes without sport focus), CI = Confidence Interval, P1 = period 1 (September 13, 2021 to October 31, 2021) P2 = period 2 (November 1, 2021 to December 31, 2021), P3 = period 3 (January 1, 2022 to February 28, 2022), P4 = period 4 (March 1, 2022 to April 30, 2022), M.S. = middle school (students aged 13.1 ± 1.3 years old), H.S. = 4-year high school (students aged 16.9 ± 1.2 years old), GB = students in school classes with a general school branch, SF = students in school classes with sport focus, n = Study population, INC = insufficient number of potential infection cases.

**Table S14.** Potential SARS-CoV-2 infection in school classes GB vs. SF classes, using hypothesized generation time - 6 days.

| Time Period | school grade | Category   | HTPPI = GT 6D |     |                    |                      |       |        |                      |
|-------------|--------------|------------|---------------|-----|--------------------|----------------------|-------|--------|----------------------|
|             |              |            | PI, No.       |     | X <sup>2</sup>     | P Value <sup>b</sup> | p-lvl | φ      | OR (95%CI)           |
|             |              |            | yes           | no  |                    |                      |       |        |                      |
| P1          | All (n=614)  | GB (n=419) | 0             | 419 | INC                |                      |       |        |                      |
|             |              | SF (n=185) | 0             | 195 |                    |                      |       |        |                      |
|             | M.S. (n=289) | GB (n=190) | 0             | 190 | INC                |                      |       |        |                      |
|             |              | SF (n=99)  | 0             | 99  |                    |                      |       |        |                      |
|             | H.S. (n=325) | GB (n=229) | 0             | 229 | INC                |                      |       |        |                      |
|             |              | SF (n=96)  | 0             | 96  |                    |                      |       |        |                      |
| P2          | All (n=614)  | GB (n=419) | 10            | 409 | 6.761              | 0.009                | **    | 0.11   | 2.92 (1.26 to 6.79)  |
|             |              | SF (n=185) | 13            | 182 |                    |                      |       |        |                      |
|             | M.S. (n=289) | GB (n=190) | 3             | 187 | 4.333 <sup>a</sup> | 0.07                 |       | 0.04   | 4.02 (0.98 to 16.44) |
|             |              | SF (n=99)  | 6             | 93  |                    |                      |       |        |                      |
|             | H.S. (n=325) | GB (n=229) | 7             | 222 | 2.943 <sup>a</sup> | 0.13                 |       | 0.09   | 2.49 (0.85 to 7.32)  |
|             |              | SF (n=96)  | 7             | 89  |                    |                      |       |        |                      |
| P3          | All (n=614)  | GB (n=419) | 45            | 374 | 39.313             | <.001                | ***   | 0.25   | 3.78 (2.45 to 5.83)  |
|             |              | SF (n=185) | 61            | 134 |                    |                      |       |        |                      |
|             | M.S. (n=289) | GB (n=190) | 21            | 169 | 16.597             | <.001                | ***   | 0.24   | 3.50 (1.88 to 6.53)  |
|             |              | SF (n=99)  | 30            | 69  |                    |                      |       |        |                      |
|             | H.S. (n=325) | GB (n=229) | 24            | 205 | 22.889             | <.001                | ***   | 0.27   | 4.08 (2.23 to 7.43)  |
|             |              | SF (n=96)  | 31            | 65  |                    |                      |       |        |                      |
| P4          | All (n=614)  | GB (n=419) | 51            | 368 | 18.758             | <.001                | ***   | -0.175 | 0.11 (0.04 to 0.37)  |
|             |              | SF (n=185) | 3             | 192 |                    |                      |       |        |                      |
|             | M.S. (n=289) | GB (n=190) | 23            | 167 | 8.377              | 0.004                | **    | -0.17  | 0.15 (0.04 to 0.65)  |
|             |              | SF (n=99)  | 2             | 97  |                    |                      |       |        |                      |
|             | H.S. (n=325) | GB (n=229) | 28            | 201 | 10.414             | 0.001                | **    | -0.18  | 0.08 (0.01 to 0.56)  |
|             |              | SF (n=96)  | 1             | 95  |                    |                      |       |        |                      |

a = 1 cell (25%) or 2 cells (50,0%) have expected count less than 5; b = If ( a ) occurred, Fisher's Exact Test was used.

SARS-CoV-2 = severe acute respiratory syndrome coronavirus 2, HTPPI = hypothetical time period assumed for potential infections, GT = generation time, D = days, PI = potential infection, No = absolute Number of children, X<sup>2</sup> = Chi-Square Test value, φ = Effect size Phi , p-lvl (P Value level) \* = P < 0.05, \*\* = P < 0.01, \*\*\* = P < 0.001, p-lvl = significance level, OR = Odds ratio for potential SARS-CoV-2 infection in school classes with sport focus vs. school classes without sport focus, using different hypothesized generation time (with 1 for students in classes without sport focus), CI = Confidence Interval, P1 = period 1 (September 13, 2021 to October 31, 2021) P2 = period 2 (November 1, 2021 to December 31, 2021), P3 = period 3 (January 1, 2022 to February 28, 2022), P4 = period 4 (March 1, 2022 to April 30, 2022), M.S. = middle school (students aged 13.1 ± 1.3 years old), H.S. = 4-year high school (students aged 16.9 ± 1.2 years old), GB = students in school classes with a general school branch, SF = students in school classes with sport focus, n = Study population, INC = insufficient number of potential infection cases.

**Table S15.** Potential SARS-CoV-2 infection in school classes GB vs. SF classes, using hypothesized generation time - 8 days.

| Time Period | school grade    | Category   | HTPPI = GT 8D |     |                    |                      |           |       |                      |
|-------------|-----------------|------------|---------------|-----|--------------------|----------------------|-----------|-------|----------------------|
|             |                 |            | PI, No.       |     | X <sup>2</sup>     | P Value <sup>b</sup> | P-<br>lvl | φ     | OR (95%CI)           |
|             |                 |            | yes           | no  |                    |                      |           |       |                      |
| P1          | All (n=614)     | GB (n=419) | 2             | 417 | INC                |                      |           |       |                      |
|             |                 | SF (n=185) | 0             | 195 |                    |                      |           |       |                      |
|             | M.S.<br>(n=289) | GB (n=190) | 0             | 190 | INC                |                      |           |       |                      |
|             |                 | SF (n=99)  | 0             | 99  |                    |                      |           |       |                      |
|             | H.S.<br>(n=325) | GB (n=229) | 2             | 227 | INC                |                      |           |       |                      |
|             |                 | SF (n=96)  | 0             | 96  |                    |                      |           |       |                      |
| P2          | All (n=614)     | GB (n=419) | 11            | 408 | 7.066              | 0.008                | **        | 0.11  | 2.87 (1.28 to 6.44)  |
|             |                 | SF (n=185) | 14            | 181 |                    |                      |           |       |                      |
|             | M.S.<br>(n=289) | GB (n=190) | 3             | 187 | 5.876 <sup>a</sup> | 0.035                | *         | 0.14  | 4.74 (1.20 to 18.76) |
|             |                 | SF (n=99)  | 7             | 92  |                    |                      |           |       |                      |
|             | H.S.<br>(n=325) | GB (n=229) | 8             | 221 | 2.217 <sup>a</sup> | 0.15                 |           | 0.08  | 2.17 (0.77 to 6.17)  |
|             |                 | SF (n=96)  | 7             | 89  |                    |                      |           |       |                      |
| P3          | All (n=614)     | GB (n=419) | 54            | 365 | 34.055             | <.001                | ***       | 0.24  | 3.30 (2.18 to 4.99)  |
|             |                 | SF (n=185) | 64            | 131 |                    |                      |           |       |                      |
|             | M.S.<br>(n=289) | GB (n=190) | 24            | 166 | 13.377             | <.001                | ***       | 0.22  | 3.01 (1.64 to 5.51)  |
|             |                 | SF (n=99)  | 30            | 69  |                    |                      |           |       |                      |
|             | H.S.<br>(n=325) | GB (n=229) | 30            | 199 | 21.302             | <.001                | ***       | 0.26  | 3.64 (2.06 to 6.42)  |
|             |                 | SF (n=96)  | 34            | 62  |                    |                      |           |       |                      |
| P4          | All (n=614)     | GB (n=419) | 56            | 363 | 19.319             | <.001                | ***       | -0.18 | 0.14 (0.05 to 0.38)  |
|             |                 | SF (n=185) | 4             | 191 |                    |                      |           |       |                      |
|             | M.S.<br>(n=289) | GB (n=190) | 25            | 165 | 7.630              | 0.006                | **        | -0.16 | 0.21 (0.06 to 0.70)  |
|             |                 | SF (n=99)  | 3             | 96  |                    |                      |           |       |                      |
|             | H.S.<br>(n=325) | GB (n=229) | 31            | 198 | 11.898             | 0.001                | **        | -0.19 | 0.07 (0.01 to 0.50)  |
|             |                 | SF (n=96)  | 1             | 95  |                    |                      |           |       |                      |

a = 1 cell (25%) or 2 cells (50,0%) have expected count less than 5; b = If ( a ) occurred, Fisher's Exact Test was used.

SARS-CoV-2 = severe acute respiratory syndrome coronavirus 2, HTPPI = hypothetical time period assumed for potential infections, GT = generation time, D = days, PI = potential infection, No = absolute Number of children, X<sup>2</sup> = Chi-Square Test value, φ = Effect size Phi, p-lvl (P Value level) \* = P < 0.05, \*\* = P < 0.01, \*\*\* = P < 0.001, p-lvl = significance level, OR = Odds ratio for potential SARS-CoV-2 infection in school classes with sport focus vs. school classes without sport focus, using different hypothesized generation time (with 1 for students in classes without sport focus), CI = Confidence Interval, P1 = period 1 (September 13, 2021 to October 31, 2021) P2 = period 2 (November 1, 2021 to December 31, 2021), P3 = period 3 (January 1, 2022 to February 28, 2022), P4 = period 4 (March 1, 2022 to April 30, 2022), M.S. = middle school (students aged 13.1 ± 1.3 years old), H.S. = 4-year high school (students aged 16.9 ± 1.2 years old), GB = students in school classes with a general school branch, SF = students in school classes with sport focus, n = Study population, INC = insufficient number of potential infection cases.



**Table S16.** Binary logistic regression for Potential SARS-Cov-2 contagions in the classroom and generation times 4 and 6, for subgroup sex .

| Time Period | school grade | Category  | Sex       | HTPPI = GT 4D |     |                      | HTPPI = GT 6D |     |                      |
|-------------|--------------|-----------|-----------|---------------|-----|----------------------|---------------|-----|----------------------|
|             |              |           |           | PI            |     | OR (95%CI)           | PI            |     | OR (95%CI)           |
|             |              |           |           | yes           | no  |                      | yes           | no  |                      |
| P1          | All (n=614)  | ♂ (n=349) | A (n=203) | 0             | 203 | INC                  | 0             | 203 | INC                  |
|             |              |           | B (n=146) | 0             | 146 |                      | 0             | 146 |                      |
|             |              | ♀ (n=265) | A (n=216) | 0             | 216 | INC                  | 0             | 216 | INC                  |
|             |              |           | B (n=49)  | 0             | 49  |                      | 0             | 49  |                      |
|             | M.S. (n=289) | ♂ (n=178) | A (n=106) | 0             | 106 | INC                  | 0             | 106 | INC                  |
|             |              |           | B (n=72)  | 0             | 72  |                      | 0             | 72  |                      |
|             |              | ♀ (n=111) | A (n=84)  | 0             | 84  | INC                  | 0             | 84  | INC                  |
|             |              |           | B (n=27)  | 0             | 27  |                      | 0             | 27  |                      |
|             | H.S. (n=325) | ♂ (n=171) | A (n=97)  | 0             | 97  | INC                  | 0             | 97  | INC                  |
|             |              |           | B (n=74)  | 0             | 74  |                      | 0             | 74  |                      |
|             |              | ♀ (n=154) | A (n=132) | 0             | 132 | INC                  | 0             | 132 | INC                  |
|             |              |           | B (n=22)  | 0             | 22  |                      | 0             | 22  |                      |
| P2          | All (n=614)  | ♂ (n=349) | A (n=203) | 4             | 199 | 3.66 (1.12 to 11.90) | 5             | 198 | 3.22 (1.10 to 9.50)  |
|             |              |           | B (n=146) | 10            | 136 |                      | 11            | 135 |                      |
|             |              | ♀ (n=265) | A (n=216) | 4             | 212 | 0.81 (0.77 to 0.86)  | 5             | 211 | 1.15 (0.34 to 9.54)  |
|             |              |           | B (n=49)  | 0             | 49  |                      | 2             | 47  |                      |
|             | M.S. (n=289) | ♂ (n=178) | A (n=106) | 1             | 105 | 9.55 (1.12 to 81.07) | 2             | 104 | 4.73 (0.93 to 24.12) |
|             |              |           | B (n=72)  | 6             | 66  |                      | 6             | 66  |                      |
|             |              | ♀ (n=111) | A (n=84)  | 0             | 84  | INC                  | 1             | 83  | INC                  |
|             |              |           | B (n=27)  | 0             | 27  |                      | 0             | 27  |                      |
|             | H.S. (n=325) | ♂ (n=171) | A (n=97)  | 3             | 94  | 1.79 (0.39 to 8.26)  | 3             | 94  | 2.27 (0.53 to 9.82)  |
|             |              |           | B (n=74)  | 4             | 70  |                      | 5             | 69  |                      |
|             |              | ♀ (n=154) | A (n=132) | 4             | 128 | 0.85 (0.80 to 0.91)  | 4             | 128 | 3.20 (0.55 to 18.63) |
|             |              |           | B (n=22)  | 0             | 22  |                      | 2             | 20  |                      |
| P3          | All (n=614)  | ♂ (n=349) | A (n=203) | 14            | 189 | 4.58 (2.37 to 8.85)  | 18            | 185 | 3.88 (2.12 to 7.11)  |
|             |              |           | B (n=146) | 37            | 109 |                      | 40            | 106 |                      |
|             |              | ♀ (n=265) | A (n=216) | 25            | 191 | 5.27 (2.60 to 10.67) | 27            | 189 | 5.25 (2.62 to 10.52) |
|             |              |           | B (n=49)  | 20            | 29  |                      | 21            | 28  |                      |
|             | M.S. (n=289) | ♂ (n=178) | A (n=106) | 8             | 98  | 3.50 (1.41 to 8.70)  | 10            | 96  | 2.97 (1.27 to 6.93)  |
|             |              |           | B (n=72)  | 16            | 56  |                      | 17            | 55  |                      |
|             |              | ♀ (n=111) | A (n=84)  | 10            | 74  | 5.92 (2.17 to 16.19) | 11            | 73  | 6.16 (2.30 to 16.51) |
|             |              |           | B (n=27)  | 12            | 15  |                      | 13            | 14  |                      |
|             | H.S. (n=325) | ♂ (n=171) | A (n=97)  | 6             | 91  | 6.01 (2.28 to 15.83) | 8             | 89  | 5.02 (2.09 to 12.04) |
|             |              |           | B (n=74)  | 21            | 53  |                      | 23            | 51  |                      |
|             |              | ♀ (n=154) | A (n=132) | 15            | 117 | 4.46 (1.61 to 12.38) | 16            | 116 | 4.14 (1.50 to 11.42) |
|             |              |           | B (n=22)  | 8             | 14  |                      | 8             | 14  |                      |
| P4          | All (n=614)  | ♂ (n=349) | A (n=203) | 14            | 189 | 0.56 (0.51 to 0.62)  | 21            | 182 | 0.12 (0.03 to 0.52)  |
|             |              |           | B (n=146) | 0             | 146 |                      | 2             | 144 |                      |
|             |              | ♀ (n=265) | A (n=216) | 23            | 193 | 0.18 (0.02 to 1.33)  | 30            | 186 | 0.13 (0.02 to 0.97)  |
|             |              |           | B (n=49)  | 1             | 48  |                      | 1             | 48  |                      |
|             | M.S. (n=289) | ♂ (n=178) | A (n=106) | 8             | 98  | 0.58 (0.51 to 0.66)  | 11            | 95  | 0.12 (0.02 to 0.96)  |
|             |              |           | B (n=72)  | 0             | 72  |                      | 1             | 71  |                      |
|             |              | ♀ (n=111) | A (n=84)  | 9             | 75  | 0.32 (0.04 to 2.65)  | 12            | 72  | 0.23 (0.03 to 1.86)  |
|             |              |           | B (n=27)  | 1             | 26  |                      | 1             | 26  |                      |
|             | H.S. (n=325) | ♂ (n=171) | A (n=97)  | 6             | 91  | 0.55 (0.48 to 0.63)  | 10            | 87  | 0.12 (0.02 to 0.95)  |
|             |              |           | B (n=74)  | 0             | 74  |                      | 1             | 73  |                      |
|             |              | ♀ (n=154) | A (n=132) | 14            | 118 | INC                  | 14            | 118 | INC                  |
|             |              |           | B (n=22)  | 0             | 22  |                      | 0             | 22  |                      |

SARS-CoV-2 = severe acute respiratory syndrome coronavirus 2, HTPPI = hypothetical time period assumed for potential infections, GT = generation time, D = days, PI = potential infection, No = absolute Number of children, OR = Odds ratio for potential SARS-CoV-2 infection in school classes with sport focus vs. school classes without sport focus, using different hypothesized generation time (with 1 for students in classes without sport focus), CI = Confidence Interval, ♂ = Boys, ♀ = Girls, P1 = period 1 (September 13, 2021 to October 31, 2021), P2 = period 2 (November 1, 2021 to December 31, 2021), P3 = period 3 (January 1, 2022 to February 28, 2022), P4 = period 4 (March 1, 2022 to April 30, 2022), M.S. = middle school (students aged 13.1 ± 1.3 years old), H.S. = 4-year high school (students aged 16.9 ± 1.2 years old), GB = students in school classes with a general school branch, SF = students in school classes with sport focus, n = Study population, INC = insufficient number of potential infection cases.

**Table S17.** Binary logistic regression for Potential SARS-Cov-2 contagions in the classroom and generation times 2 and 8, for subgroup sex .

| Time Period | school grade | Category  | Sex       | HTPPI = GT 2D |     |                      | HTPPI = GT 8D |     |                      |
|-------------|--------------|-----------|-----------|---------------|-----|----------------------|---------------|-----|----------------------|
|             |              |           |           | PI            |     | OR (95%CI)           | PI            |     | OR (95%CI)           |
|             |              |           |           | yes           | no  |                      | yes           | no  |                      |
| P1          | All (n=614)  | ♂ (n=349) | A (n=203) | 0             | 203 | INC                  | 1             | 202 | INC                  |
|             |              |           | B (n=146) | 0             | 146 |                      | 0             | 146 |                      |
|             |              | ♀ (n=265) | A (n=216) | 0             | 216 | INC                  | 1             | 215 | INC                  |
|             |              |           | B (n=49)  | 0             | 49  |                      | 0             | 49  |                      |
|             | M.S. (n=289) | ♂ (n=178) | A (n=106) | 0             | 106 | INC                  | 0             | 106 | INC                  |
|             |              |           | B (n=72)  | 0             | 72  |                      | 0             | 72  |                      |
|             |              | ♀ (n=111) | A (n=84)  | 0             | 84  | INC                  | 0             | 84  | INC                  |
|             |              |           | B (n=27)  | 0             | 27  |                      | 0             | 27  |                      |
|             | H.S. (n=325) | ♂ (n=171) | A (n=97)  | 0             | 97  | INC                  | 1             | 96  | INC                  |
|             |              |           | B (n=74)  | 0             | 74  |                      | 0             | 74  |                      |
|             |              | ♀ (n=154) | A (n=132) | 0             | 132 | INC                  | 1             | 131 | INC                  |
|             |              |           | B (n=22)  | 0             | 22  |                      | 0             | 22  |                      |
| P2          | All (n=614)  | ♂ (n=349) | A (n=203) | 2             | 201 | 5.06 (1.04 to 24.73) | 5             | 198 | 3.55 (1.22 to 10.30) |
|             |              |           | B (n=146) | 7             | 139 |                      | 12            | 135 |                      |
|             |              | ♀ (n=265) | A (n=216) | 1             | 215 | INC                  | 6             | 210 | 1.49 (0.30 to 7.61)  |
|             |              |           | B (n=49)  | 0             | 49  |                      | 2             | 47  |                      |
|             | M.S. (n=289) | ♂ (n=178) | A (n=106) | 0             | 106 | INC                  | 2             | 104 | 5.60 (1.13 to 27.79) |
|             |              |           | B (n=72)  | 5             | 67  |                      | 7             | 65  |                      |
|             |              | ♀ (n=111) | A (n=84)  | 0             | 84  | INC                  | 1             | 83  | INC                  |
|             |              |           | B (n=27)  | 0             | 27  |                      | 0             | 27  |                      |
|             | H.S. (n=325) | ♂ (n=171) | A (n=97)  | 2             | 95  | 1.32 (0.18 to 9.59)  | 3             | 94  | 2.27 (0.53 to 9.82)  |
|             |              |           | B (n=74)  | 2             | 72  |                      | 5             | 69  |                      |
|             |              | ♀ (n=154) | A (n=132) | 1             | 131 | INC                  | 5             | 127 | 2.54 (0.46 to 13.99) |
|             |              |           | B (n=22)  | 0             | 22  |                      | 2             | 20  |                      |
| P3          | All (n=614)  | ♂ (n=349) | A (n=203) | 9             | 194 | 4.45 (2.01 to 9.86)  | 21            | 182 | 3.50 (1.97 to 6.23)  |
|             |              |           | B (n=146) | 25            | 121 |                      | 42            | 104 |                      |
|             |              | ♀ (n=265) | A (n=216) | 17            | 199 | 5.68 (2.61 to 12.33) | 33            | 183 | 4.52 (2.30 to 8.87)  |
|             |              |           | B (n=49)  | 16            | 33  |                      | 22            | 27  |                      |
|             | M.S. (n=289) | ♂ (n=178) | A (n=106) | 6             | 100 | 3.67 (1.33 to 10.18) | 11            | 95  | 2.67 (1.17 to 6.11)  |
|             |              |           | B (n=72)  | 13            | 59  |                      | 17            | 55  |                      |
|             |              | ♀ (n=111) | A (n=84)  | 6             | 78  | 6.50 (2.05 to 20.59) | 13            | 71  | 5.07 (1.94 to 13.23) |
|             |              |           | B (n=27)  | 9             | 18  |                      | 13            | 14  |                      |
|             | H.S. (n=325) | ♂ (n=171) | A (n=97)  | 3             | 94  | 6.07 (1.64 to 22.37) | 10            | 87  | 4.44 (1.97 to 10.00) |
|             |              |           | B (n=74)  | 12            | 62  |                      | 25            | 49  |                      |
|             |              | ♀ (n=154) | A (n=132) | 11            | 121 | 5.13 (1.73 to 15.25) | 20            | 112 | 3.88 (1.46 to 10.27) |
|             |              |           | B (n=22)  | 7             | 15  |                      | 9             | 13  |                      |
| P4          | All (n=614)  | ♂ (n=349) | A (n=203) | 11            | 192 | INC                  | 25            | 178 | 0.15 (0.04 to 0.51)  |
|             |              |           | B (n=146) | 0             | 146 |                      | 3             | 143 |                      |
|             |              | ♀ (n=265) | A (n=216) | 17            | 199 | INC                  | 31            | 185 | 0.12 (0.02 to 0.93)  |
|             |              |           | B (n=49)  | 0             | 49  |                      | 1             | 48  |                      |
|             | M.S. (n=289) | ♂ (n=178) | A (n=106) | 6             | 100 | INC                  | 13            | 93  | 0.20 (0.05 to 0.94)  |
|             |              |           | B (n=72)  | 0             | 72  |                      | 2             | 72  |                      |
|             |              | ♀ (n=111) | A (n=84)  | 8             | 76  | INC                  | 12            | 72  | 0.23 (0.03 to 1.86)  |
|             |              |           | B (n=27)  | 0             | 27  |                      | 1             | 26  |                      |
|             | H.S. (n=325) | ♂ (n=171) | A (n=97)  | 5             | 92  | INC                  | 12            | 85  | 0.10 (0.01 to 0.76)  |
|             |              |           | B (n=74)  | 0             | 74  |                      | 1             | 73  |                      |
|             |              | ♀ (n=154) | A (n=132) | 9             | 123 | INC                  | 19            | 113 | INC                  |
|             |              |           | B (n=22)  | 0             | 22  |                      | 0             | 22  |                      |

SARS-CoV-2 = severe acute respiratory syndrome coronavirus 2, HTPPI = hypothetical time period assumed for potential infections, GT = generation time, D = days, PI = potential infection, No = absolute Number of children, OR = Odds ratio for potential SARS-CoV-2 infection in school classes with sport focus vs. school classes without sport focus, using different hypothesized generation time (with 1 for students in classes without sport focus), CI = Confidence Interval, ♂ = Boys, ♀ = Girls, P1 = period 1 (September 13, 2021 to October 31, 2021), P2 = period 2 (November 1, 2021 to December 31, 2021), P3 = period 3 (January 1, 2022 to February 28, 2022), P4 = period 4 (March 1, 2022 to April 30, 2022), M.S. = middle school (students aged 13.1 ± 1.3 years old), H.S. = 4-year high school (students aged 16.9 ± 1.2 years old), GB = students in school classes with a general school branch, SF = students in school classes with sport focus, n = Study population, INC = insufficient number of potential infection cases.

**Figure S1.** Cumulative percentage of children with SARS-CoV-2 infections, for subgroup sex

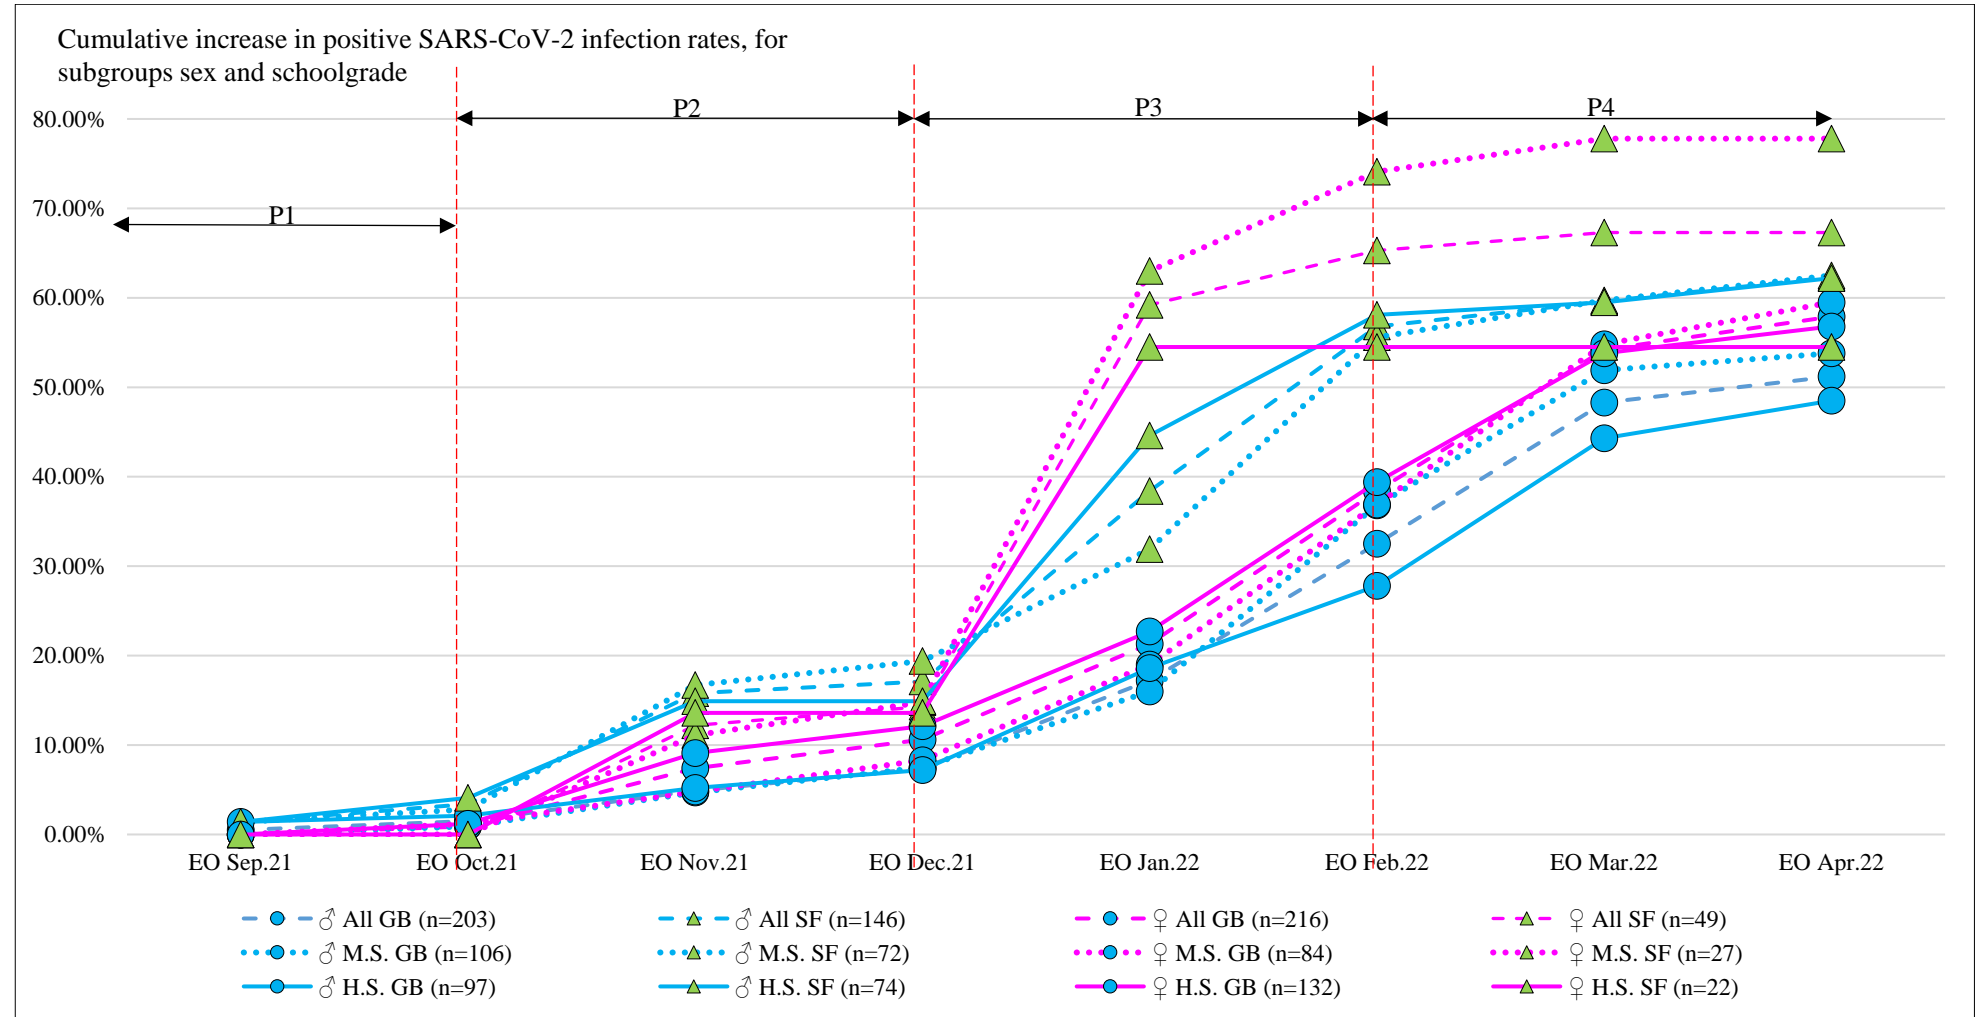

SARS-CoV-2 = severe acute respiratory syndrome coronavirus 2, P1 = period 1 (13. September to 31. October 2021), P2 = period 2 (November 1, 2021 to December 31, 2021), P3 = period 3 (January 1, 2022 to February 28, 2022), P4 = period 4 (March 1, 2022 to April 30, 2022), EO = End of, Sep.21 = September 2021, Oct. = October 2021, Nov.21 = November 2021, Dec.21 = December 2021, Jan.22 = January 2022, Feb.22 = February 2022, Mar.22 = March 2022, Apr.22 = April 2022, ♀ = Girls, ♂ = Boys, GB = students in school classes with a general school branch, SF = students in school classes with sport focus, M.S. = middle school (students aged  $13.1 \pm 1.3$  years old), H.S. = 4-year high school (students aged  $16.9 \pm 1.2$  years old), n = Study population.
